# Supplementary material for: Differentially Expressed RNA from Public Microarray Data Identifies Serum Protein Biomarkers for Cross-Organ Transplant Rejection and Other Conditions
Source: PLoS Comput Biol. 2010 Sep 23;6(9):e1000940. doi: 10.1371/journal.pcbi.1000940 (PMC2944782; doi:10.1371/journal.pcbi.1000940)
Supplement: Dataset S1 — Predicted diagnostics protein biomarkers on 22 diseases. (1.39 MB XLS) [file pcbi.1000940.s001.xls]

## Sheet: Predicted_protein_biomarkers
disease	Gene	Entrez_ID	study_cnt	fold
Breast Cancer	COL11A1	1301	6	4.78
Breast Cancer	DSC2	1824	6	2.88
Breast Cancer	KRT15	3866	6	0.94
Breast Cancer	PTHLH	5744	6	0.56
Breast Cancer	PTGER3	5733	6	0.21
Breast Cancer	OGN	4969	6	0.18
Breast Cancer	GPD1	2819	6	0.13
Breast Cancer	S100P	6286	5	5.91
Breast Cancer	FN1	2335	5	3.3
Breast Cancer	CRISP3	10321	5	2.57
Breast Cancer	SDC1	6382	5	1.96
Breast Cancer	PVALB	5816	5	1.63
Breast Cancer	S100A8	6279	5	1.55
Breast Cancer	OAS1	4938	5	1.52
Breast Cancer	EGFR	1956	5	1.49
Breast Cancer	TACSTD1	4072	5	1.47
Breast Cancer	PDE4DIP	9659	5	1.44
Breast Cancer	COL4A5	1287	5	1.37
Breast Cancer	CDH3	1001	5	1.37
Breast Cancer	CFB	629	5	1.24
Breast Cancer	MMP7	4316	5	1.1
Breast Cancer	IRS2	8660	5	1.08
Breast Cancer	SERPINA6	866	5	1.06
Breast Cancer	KRT5	3852	5	0.87
Breast Cancer	ANXA3	306	5	0.83
Breast Cancer	CCL5	6352	5	0.82
Breast Cancer	PLEKHC1	10979	5	0.69
Breast Cancer	GSTM3	2947	5	0.67
Breast Cancer	SEPP1	6414	5	0.59
Breast Cancer	EGR1	1958	5	0.54
Breast Cancer	EFEMP1	2202	5	0.52
Breast Cancer	AHNAK	79026	5	0.5
Breast Cancer	HPGD	3248	5	0.48
Breast Cancer	WFDC2	10406	5	0.48
Breast Cancer	FGFR2	2263	5	0.46
Breast Cancer	KRT17	3872	5	0.43
Breast Cancer	CX3CR1	1524	5	0.41
Breast Cancer	CPB1	1360	5	0.41
Breast Cancer	HBB	3043	5	0.36
Breast Cancer	SRPX	8406	5	0.31
Breast Cancer	PGR	5241	5	0.3
Breast Cancer	TGFBR3	7049	5	0.29
Breast Cancer	LEP	3952	5	0.27
Breast Cancer	FABP4	2167	5	0.25
Breast Cancer	GNAI1	2770	5	0.15
Breast Cancer	ENPP2	5168	5	0.13
Breast Cancer	CFD	1675	5	0.11
Breast Cancer	MYH11	4629	5	0.11
Breast Cancer	MMP1	4312	4	7.48
Breast Cancer	RRM2	6241	4	6.05
Breast Cancer	COL10A1	1300	4	5.64
Breast Cancer	ADAMDEC1	27299	4	4.95
Breast Cancer	S100A2	6273	4	4.58
Breast Cancer	SERPINE1	5054	4	3.8
Breast Cancer	MMP13	4322	4	3.6
Breast Cancer	MKI67	4288	4	2.85
Breast Cancer	INHBA	3624	4	2.78
Breast Cancer	STAT1	6772	4	2.37
Breast Cancer	LBP	3929	4	2.13
Breast Cancer	KRT18	3875	4	2.1
Breast Cancer	CENPF	1063	4	2.09
Breast Cancer	OAS2	4939	4	2.05
Breast Cancer	CRABP2	1382	4	1.8
Breast Cancer	UCHL1	7345	4	1.75
Breast Cancer	COL2A1	1280	4	1.74
Breast Cancer	SLC7A11	23657	4	1.63
Breast Cancer	MIA	8190	4	1.58
Breast Cancer	CSTA	1475	4	1.53
Breast Cancer	GGH	8836	4	1.48
Breast Cancer	MMP3	4314	4	1.47
Breast Cancer	CTSS	1520	4	1.47
Breast Cancer	PGK1	5230	4	1.4
Breast Cancer	ATP2A3	489	4	1.38
Breast Cancer	HOOK1	51361	4	1.36
Breast Cancer	ITPR2	3709	4	1.31
Breast Cancer	MMP9	4318	4	1.29
Breast Cancer	EGF	1950	4	1.28
Breast Cancer	CA2	760	4	1.28
Breast Cancer	PSD3	23362	4	1.19
Breast Cancer	NULL	4133	4	1.18
Breast Cancer	ASRGL1	80150	4	1.12
Breast Cancer	COL1A2	1278	4	1.1
Breast Cancer	ESR1	2099	4	1.08
Breast Cancer	CDH1	999	4	1.07
Breast Cancer	SOD2	6648	4	1.05
Breast Cancer	MARCKS	4082	4	1.05
Breast Cancer	MSMB	4477	4	0.99
Breast Cancer	EPC1	80314	4	0.98
Breast Cancer	TFF3	7033	4	0.94
Breast Cancer	PHLDB2	90102	4	0.92
Breast Cancer	IGFBP5	3488	4	0.91
Breast Cancer	NULL	131566	4	0.9
Breast Cancer	SORL1	6653	4	0.89
Breast Cancer	QDPR	5860	4	0.87
Breast Cancer	SERPINA5	5104	4	0.87
Breast Cancer	RELN	5649	4	0.84
Breast Cancer	IDH2	3418	4	0.84
Breast Cancer	CELSR2	1952	4	0.83
Breast Cancer	EPAS1	2034	4	0.83
Breast Cancer	C1orf24	116496	4	0.82
Breast Cancer	VTCN1	79679	4	0.82
Breast Cancer	CCL2	6347	4	0.8
Breast Cancer	SERPINI1	5274	4	0.8
Breast Cancer	PLK2	10769	4	0.77
Breast Cancer	XDH	7498	4	0.77
Breast Cancer	MUC1	4582	4	0.77
Breast Cancer	SPTBN1	6711	4	0.76
Breast Cancer	FKBP5	2289	4	0.73
Breast Cancer	TUSC3	7991	4	0.71
Breast Cancer	GPR116	221395	4	0.7
Breast Cancer	PIP	5304	4	0.7
Breast Cancer	PROM1	8842	4	0.69
Breast Cancer	PON3	5446	4	0.68
Breast Cancer	GPR105	9934	4	0.67
Breast Cancer	GPRC5B	51704	4	0.67
Breast Cancer	CHI3L1	1116	4	0.66
Breast Cancer	COL3A1	1281	4	0.65
Breast Cancer	SAA2	6289	4	0.65
Breast Cancer	SLPI	6590	4	0.64
Breast Cancer	CALML3	810	4	0.63
Breast Cancer	THY1	7070	4	0.61
Breast Cancer	ADAMTS1	9510	4	0.6
Breast Cancer	UTRN	7402	4	0.59
Breast Cancer	SCGB2A2	4250	4	0.55
Breast Cancer	PROS1	5627	4	0.54
Breast Cancer	NRP1	8829	4	0.53
Breast Cancer	DCAMKL1	9201	4	0.51
Breast Cancer	ATF3	467	4	0.5
Breast Cancer	NBL1	4681	4	0.5
Breast Cancer	LTF	4057	4	0.5
Breast Cancer	COLEC12	81035	4	0.5
Breast Cancer	ANPEP	290	4	0.5
Breast Cancer	MGP	4256	4	0.49
Breast Cancer	AOX1	316	4	0.47
Breast Cancer	NAV3	89795	4	0.44
Breast Cancer	IL6ST	3572	4	0.44
Breast Cancer	SLC26A3	1811	4	0.43
Breast Cancer	COL14A1	7373	4	0.42
Breast Cancer	ABCB1	5243	4	0.41
Breast Cancer	SERPINA3	12	4	0.38
Breast Cancer	CX3CL1	6376	4	0.38
Breast Cancer	KIT	3815	4	0.36
Breast Cancer	C3	718	4	0.35
Breast Cancer	SYNPO2	171024	4	0.35
Breast Cancer	FASN	2194	4	0.34
Breast Cancer	PYGM	5837	4	0.34
Breast Cancer	SCUBE2	57758	4	0.34
Breast Cancer	SAA1	6288	4	0.34
Breast Cancer	PDGFRA	5156	4	0.32
Breast Cancer	FOXA1	3169	4	0.3
Breast Cancer	THBD	7056	4	0.28
Breast Cancer	S100B	6285	4	0.26
Breast Cancer	ZBTB16	7704	4	0.26
Breast Cancer	LAMA2	3908	4	0.25
Breast Cancer	ACACB	32	4	0.25
Breast Cancer	APOD	347	4	0.22
Breast Cancer	AGT	183	4	0.22
Breast Cancer	VWF	7450	4	0.2
Breast Cancer	MME	4311	4	0.17
Breast Cancer	SFRP1	6422	4	0.17
Breast Cancer	GSN	2934	4	0.16
Breast Cancer	IGF1	3479	4	0.15
Breast Cancer	AQP1	358	4	0.15
Breast Cancer	GPX3	2878	4	0.14
Breast Cancer	IGFBP6	3489	4	0.13
Breast Cancer	DPT	1805	4	0.12
Breast Cancer	SNCG	6623	4	0.08
Breast Cancer	AOC3	8639	4	0.07
Breast Cancer	RBP4	5950	4	0.02
Breast Cancer	SERPINE2	5270	3	4.31
Breast Cancer	CXCL10	3627	3	3.88
Breast Cancer	DLG7	9787	3	3.58
Breast Cancer	SPP1	6696	3	3.45
Breast Cancer	SOX11	6664	3	3.35
Breast Cancer	HMMR	3161	3	3.2
Breast Cancer	ITGA3	3675	3	3.1
Breast Cancer	PTK7	5754	3	2.9
Breast Cancer	LAMA3	3909	3	2.77
Breast Cancer	SQLE	6713	3	2.63
Breast Cancer	IFI27	3429	3	2.5
Breast Cancer	CD44	960	3	2.41
Breast Cancer	IQGAP1	8826	3	2.35
Breast Cancer	GPNMB	10457	3	2.3
Breast Cancer	THBS1	7057	3	2.29
Breast Cancer	FCGR3A	2214	3	2.23
Breast Cancer	CDCA7	83879	3	2.15
Breast Cancer	S100A9	6280	3	2.12
Breast Cancer	CST6	1474	3	2.09
Breast Cancer	CHEK1	1111	3	2.05
Breast Cancer	RB1	5925	3	2.02
Breast Cancer	PRLR	5618	3	2.01
Breast Cancer	RAD21	5885	3	2
Breast Cancer	KIF5B	3799	3	1.98
Breast Cancer	IFI44	10561	3	1.98
Breast Cancer	PKP1	5317	3	1.97
Breast Cancer	MMP14	4323	3	1.97
Breast Cancer	ASS	445	3	1.94
Breast Cancer	BGN	633	3	1.91
Breast Cancer	TMEPAI	56937	3	1.91
Breast Cancer	E2F8	79733	3	1.91
Breast Cancer	MYO5A	4644	3	1.85
Breast Cancer	EXO1	9156	3	1.84
Breast Cancer	NULL	25953	3	1.77
Breast Cancer	QPRT	23475	3	1.76
Breast Cancer	APOC1	341	3	1.76
Breast Cancer	ENDOD1	23052	3	1.73
Breast Cancer	HIST1H1C	3006	3	1.72
Breast Cancer	PTPN13	5783	3	1.69
Breast Cancer	PSCA	8000	3	1.63
Breast Cancer	BMPR2	659	3	1.62
Breast Cancer	CSDA	8531	3	1.62
Breast Cancer	COL12A1	1303	3	1.6
Breast Cancer	KIAA1212	55704	3	1.6
Breast Cancer	PFKP	5214	3	1.59
Breast Cancer	NULL	5058	3	1.52
Breast Cancer	BIRC4	331	3	1.52
Breast Cancer	AASS	10157	3	1.52
Breast Cancer	PSAT1	29968	3	1.51
Breast Cancer	FRAS1	80144	3	1.5
Breast Cancer	SNAP25	6616	3	1.48
Breast Cancer	C4BPB	725	3	1.43
Breast Cancer	IL1RN	3557	3	1.4
Breast Cancer	ABCC11	85320	3	1.38
Breast Cancer	FAT	2195	3	1.38
Breast Cancer	PRAME	23532	3	1.34
Breast Cancer	ANTXR1	84168	3	1.32
Breast Cancer	CNTNAP2	26047	3	1.32
Breast Cancer	GM2A	2760	3	1.31
Breast Cancer	CELSR1	9620	3	1.29
Breast Cancer	MUC16	94025	3	1.29
Breast Cancer	PLAUR	5329	3	1.28
Breast Cancer	NET1	10276	3	1.26
Breast Cancer	SON	6651	3	1.25
Breast Cancer	CPAMD8	27151	3	1.24
Breast Cancer	CLGN	1047	3	1.18
Breast Cancer	FLNA	2316	3	1.17
Breast Cancer	KLK11	11012	3	1.17
Breast Cancer	HDC	3067	3	1.15
Breast Cancer	CHL1	10752	3	1.1
Breast Cancer	CD83	9308	3	1.08
Breast Cancer	CRYM	1428	3	1.08
Breast Cancer	CACNA1H	8912	3	1.04
Breast Cancer	RIMS2	9699	3	1.04
Breast Cancer	SLC15A2	6565	3	1.03
Breast Cancer	IQGAP2	10788	3	1.02
Breast Cancer	FAM3B	54097	3	1.01
Breast Cancer	HGD	3081	3	0.98
Breast Cancer	RBP1	5947	3	0.97
Breast Cancer	COL5A1	1289	3	0.97
Breast Cancer	SLC12A2	6558	3	0.96
Breast Cancer	B4GALT1	2683	3	0.95
Breast Cancer	SCGB2A1	4246	3	0.94
Breast Cancer	NNT	23530	3	0.94
Breast Cancer	SVIL	6840	3	0.93
Breast Cancer	PRNP	5621	3	0.93
Breast Cancer	GP2	2813	3	0.93
Breast Cancer	AKR1B10	57016	3	0.91
Breast Cancer	MUC20	200958	3	0.89
Breast Cancer	CLIC4	25932	3	0.89
Breast Cancer	THBS4	7060	3	0.87
Breast Cancer	FSTL1	11167	3	0.86
Breast Cancer	NCAM1	4684	3	0.86
Breast Cancer	CDH13	1012	3	0.86
Breast Cancer	RARRES1	5918	3	0.85
Breast Cancer	SYCP2	10388	3	0.85
Breast Cancer	ADM	133	3	0.84
Breast Cancer	EFNA5	1946	3	0.82
Breast Cancer	SYTL2	54843	3	0.8
Breast Cancer	PAM	5066	3	0.79
Breast Cancer	PTPNS1	140885	3	0.77
Breast Cancer	SELL	6402	3	0.76
Breast Cancer	CD55	1604	3	0.74
Breast Cancer	FGB	2244	3	0.74
Breast Cancer	ASPH	444	3	0.73
Breast Cancer	PCDHA5	56143	3	0.71
Breast Cancer	CSF1R	1436	3	0.71
Breast Cancer	PCDHA11	56138	3	0.71
Breast Cancer	APOB	338	3	0.7
Breast Cancer	BAMBI	25805	3	0.69
Breast Cancer	TRIM29	23650	3	0.69
Breast Cancer	TMPRSS2	7113	3	0.68
Breast Cancer	OLFM1	10439	3	0.67
Breast Cancer	C6orf97	80129	3	0.66
Breast Cancer	CRISPLD1	83690	3	0.63
Breast Cancer	WISP2	8839	3	0.63
Breast Cancer	CKB	1152	3	0.63
Breast Cancer	OLFM4	10562	3	0.63
Breast Cancer	NULL	9208	3	0.62
Breast Cancer	DMD	1756	3	0.62
Breast Cancer	IL4R	3566	3	0.61
Breast Cancer	SELE	6401	3	0.61
Breast Cancer	PGLYRP2	114770	3	0.6
Breast Cancer	PTGDS	5730	3	0.6
Breast Cancer	PI15	51050	3	0.6
Breast Cancer	GNG12	55970	3	0.6
Breast Cancer	PIGR	5284	3	0.59
Breast Cancer	STC1	6781	3	0.59
Breast Cancer	PDZK1IP1	10158	3	0.57
Breast Cancer	DNAH5	1767	3	0.56
Breast Cancer	AMY2B	280	3	0.56
Breast Cancer	AMY2A	279	3	0.56
Breast Cancer	MAP1B	4131	3	0.56
Breast Cancer	NOV	4856	3	0.55
Breast Cancer	LEPR	3953	3	0.55
Breast Cancer	FLRT3	23767	3	0.55
Breast Cancer	C1S	716	3	0.54
Breast Cancer	TCN1	6947	3	0.54
Breast Cancer	NULL	57451	3	0.54
Breast Cancer	SYTL4	94121	3	0.54
Breast Cancer	DBCCR1	1620	3	0.54
Breast Cancer	SCGB1D2	10647	3	0.53
Breast Cancer	KRT6B	3854	3	0.53
Breast Cancer	SLC1A1	6505	3	0.53
Breast Cancer	TAT	6898	3	0.53
Breast Cancer	C4orf18	51313	3	0.52
Breast Cancer	KIAA0644	9865	3	0.52
Breast Cancer	KIF5C	3800	3	0.52
Breast Cancer	MGC45438	146556	3	0.5
Breast Cancer	ITIH2	3698	3	0.5
Breast Cancer	CST3	1471	3	0.48
Breast Cancer	C1R	715	3	0.48
Breast Cancer	SCGB3A1	92304	3	0.48
Breast Cancer	ALDH1A2	8854	3	0.48
Breast Cancer	SFRP4	6424	3	0.47
Breast Cancer	ERBB4	2066	3	0.46
Breast Cancer	CFI	3426	3	0.46
Breast Cancer	DCDC2	51473	3	0.45
Breast Cancer	FGFR1	2260	3	0.44
Breast Cancer	PTPRM	5797	3	0.44
Breast Cancer	LGALS1	3956	3	0.43
Breast Cancer	ANXA1	301	3	0.43
Breast Cancer	CGNL1	84952	3	0.42
Breast Cancer	LRP2	4036	3	0.41
Breast Cancer	LRP1	4035	3	0.41
Breast Cancer	AKR1C3	8644	3	0.4
Breast Cancer	SEMA3C	10512	3	0.4
Breast Cancer	CDH5	1003	3	0.39
Breast Cancer	ITPR1	3708	3	0.39
Breast Cancer	PLAT	5327	3	0.38
Breast Cancer	FCGBP	8857	3	0.38
Breast Cancer	COL6A1	1291	3	0.38
Breast Cancer	COL15A1	1306	3	0.37
Breast Cancer	TPM2	7169	3	0.36
Breast Cancer	PGM5	5239	3	0.36
Breast Cancer	PENK	5179	3	0.36
Breast Cancer	MMRN	22915	3	0.36
Breast Cancer	MAPT	4137	3	0.35
Breast Cancer	MOSC1	64757	3	0.35
Breast Cancer	ICAM2	3384	3	0.33
Breast Cancer	ANK2	287	3	0.33
Breast Cancer	NID1	4811	3	0.33
Breast Cancer	SEMA6D	80031	3	0.33
Breast Cancer	SERPINB5	5268	3	0.33
Breast Cancer	HEPH	9843	3	0.32
Breast Cancer	DDR2	4921	3	0.32
Breast Cancer	DST	667	3	0.31
Breast Cancer	TF	7018	3	0.31
Breast Cancer	ART3	419	3	0.31
Breast Cancer	SPARCL1	8404	3	0.3
Breast Cancer	CRYAB	1410	3	0.3
Breast Cancer	SPARC	6678	3	0.29
Breast Cancer	MAN1A1	4121	3	0.29
Breast Cancer	CXCL12	6387	3	0.28
Breast Cancer	KLK6	5653	3	0.26
Breast Cancer	SERPINF1	5176	3	0.26
Breast Cancer	LTBP4	8425	3	0.26
Breast Cancer	EDN3	1908	3	0.25
Breast Cancer	ANGPTL2	23452	3	0.24
Breast Cancer	MYLK	4638	3	0.23
Breast Cancer	F13A1	2162	3	0.23
Breast Cancer	AQP7	364	3	0.23
Breast Cancer	GPC3	2719	3	0.23
Breast Cancer	MFAP4	4239	3	0.22
Breast Cancer	C7	730	3	0.21
Breast Cancer	FZD4	8322	3	0.2
Breast Cancer	SERPING1	710	3	0.19
Breast Cancer	RNASE4	6038	3	0.18
Breast Cancer	IGJ	3512	3	0.15
Breast Cancer	RARRES2	5919	3	0.13
Breast Cancer	NPR3	4883	3	0.11
Breast Cancer	ALDH1A1	216	3	0.1
Breast Cancer	CLEC3B	7123	3	0.1
Breast Cancer	ADIPOQ	9370	3	0.09
Breast Cancer	GHR	2690	3	0.07
Breast Cancer	ACTA1	58	3	0.05
Breast Cancer	NULL	729359	3	0.04
Breast Cancer	TRABD	80305	2	8.23
Breast Cancer	CA6	765	2	7.95
Breast Cancer	CCNB2	9133	2	7.8
Breast Cancer	TG	7038	2	7.66
Breast Cancer	ATP6V0A2	23545	2	7.33
Breast Cancer	LAMA5	3911	2	6.12
Breast Cancer	NULL	55635	2	6.11
Breast Cancer	BUB1	699	2	5.66
Breast Cancer	KIF4A	24137	2	5.42
Breast Cancer	AFF4	27125	2	5.33
Breast Cancer	MSLN	10232	2	5.22
Breast Cancer	LAMB3	3914	2	5.03
Breast Cancer	DSG2	1829	2	4.95
Breast Cancer	DIAPH3	81624	2	4.28
Breast Cancer	DSP	1832	2	4.1
Breast Cancer	NF1	4763	2	3.97
Breast Cancer	MMP11	4320	2	3.92
Breast Cancer	COTL1	23406	2	3.72
Breast Cancer	CPD	1362	2	3.58
Breast Cancer	CAPG	822	2	3.44
Breast Cancer	MYO1B	4430	2	3.39
Breast Cancer	NULL	128239	2	3.38
Breast Cancer	ESPL1	9700	2	3.35
Breast Cancer	BRCA1	672	2	3.18
Breast Cancer	LCN2	3934	2	3.15
Breast Cancer	KRT14	3861	2	3.13
Breast Cancer	CD109	135228	2	3.13
Breast Cancer	LRRC15	131578	2	2.96
Breast Cancer	S100A7	6278	2	2.95
Breast Cancer	FABP5	2171	2	2.94
Breast Cancer	OLR1	4973	2	2.89
Breast Cancer	CGA	1081	2	2.8
Breast Cancer	ANK3	288	2	2.79
Breast Cancer	SPRR1B	6699	2	2.73
Breast Cancer	ABCA12	26154	2	2.72
Breast Cancer	MCM10	55388	2	2.69
Breast Cancer	COMP	1311	2	2.68
Breast Cancer	VEGFA	7422	2	2.6
Breast Cancer	CDKN1A	1026	2	2.58
Breast Cancer	HYAL1	3373	2	2.52
Breast Cancer	PLOD2	5352	2	2.51
Breast Cancer	LMNB1	4001	2	2.49
Breast Cancer	MCM2	4171	2	2.46
Breast Cancer	ATP13A3	79572	2	2.45
Breast Cancer	FLJ25416	220042	2	2.44
Breast Cancer	PLAU	5328	2	2.43
Breast Cancer	KIF23	9493	2	2.41
Breast Cancer	TIMP1	7076	2	2.38
Breast Cancer	TFRC	7037	2	2.37
Breast Cancer	DHX36	170506	2	2.37
Breast Cancer	JUP	3728	2	2.36
Breast Cancer	MYST3	7994	2	2.34
Breast Cancer	HSPH1	10808	2	2.32
Breast Cancer	ARG1	383	2	2.28
Breast Cancer	NRCAM	4897	2	2.27
Breast Cancer	PAFAH1B3	5050	2	2.25
Breast Cancer	BAIAP2L1	55971	2	2.24
Breast Cancer	SFN	2810	2	2.22
Breast Cancer	HPN	3249	2	2.2
Breast Cancer	GSTP1	2950	2	2.2
Breast Cancer	GPRC5A	9052	2	2.19
Breast Cancer	IFI30	10437	2	2.18
Breast Cancer	IL4	3565	2	2.15
Breast Cancer	VCAN	1462	2	2.14
Breast Cancer	CTSC	1075	2	2.13
Breast Cancer	NELL1	4745	2	2.12
Breast Cancer	ATP6V1C2	245973	2	2.12
Breast Cancer	BAIAP2	10458	2	2.11
Breast Cancer	PTK2	5747	2	2.1
Breast Cancer	LGALS3BP	3959	2	2.06
Breast Cancer	USP9X	8239	2	2.06
Breast Cancer	CALML5	51806	2	2.05
Breast Cancer	TRPS1	7227	2	2.04
Breast Cancer	INHBC	3626	2	2.04
Breast Cancer	GALNT3	2591	2	2.03
Breast Cancer	LCN1	3933	2	2.01
Breast Cancer	MCM6	4175	2	2.01
Breast Cancer	IL18	3606	2	2.01
Breast Cancer	KRT8	3856	2	2
Breast Cancer	RGS12	6002	2	2
Breast Cancer	IL8	3576	2	1.98
Breast Cancer	SLC39A4	55630	2	1.98
Breast Cancer	STX6	10228	2	1.97
Breast Cancer	CHD2	1106	2	1.97
Breast Cancer	PYGB	5834	2	1.95
Breast Cancer	CPSF1	29894	2	1.95
Breast Cancer	ENO1	2023	2	1.95
Breast Cancer	HSPA6	3310	2	1.95
Breast Cancer	OAS3	4940	2	1.94
Breast Cancer	IFIH1	64135	2	1.9
Breast Cancer	GUCY2D	3000	2	1.9
Breast Cancer	NOTCH1	4851	2	1.9
Breast Cancer	UPK1A	11045	2	1.89
Breast Cancer	PTPRS	5802	2	1.87
Breast Cancer	SLC44A4	80736	2	1.86
Breast Cancer	CCL4	6351	2	1.84
Breast Cancer	HNT	50863	2	1.84
Breast Cancer	XAF1	54739	2	1.84
Breast Cancer	RNASE2	6036	2	1.83
Breast Cancer	AIM1	202	2	1.83
Breast Cancer	ARTS-1	51752	2	1.81
Breast Cancer	UNC5B	219699	2	1.8
Breast Cancer	TNRC6A	27327	2	1.78
Breast Cancer	CSPG3	1463	2	1.78
Breast Cancer	EPPK1	83481	2	1.78
Breast Cancer	YME1L1	10730	2	1.78
Breast Cancer	NUP210	23225	2	1.76
Breast Cancer	PLXNC1	10154	2	1.75
Breast Cancer	ACTN1	87	2	1.75
Breast Cancer	RTN4	57142	2	1.72
Breast Cancer	NULL	114787	2	1.7
Breast Cancer	IL1R2	7850	2	1.7
Breast Cancer	DDR1	780	2	1.69
Breast Cancer	LYPD3	27076	2	1.69
Breast Cancer	IDS	3423	2	1.69
Breast Cancer	DDC	1644	2	1.68
Breast Cancer	HBEGF	1839	2	1.67
Breast Cancer	PTPRO	5800	2	1.67
Breast Cancer	NOX4	50507	2	1.66
Breast Cancer	MIF	4282	2	1.65
Breast Cancer	GAPDH	2597	2	1.65
Breast Cancer	CECR1	51816	2	1.63
Breast Cancer	MSH2	4436	2	1.62
Breast Cancer	RAB2	5862	2	1.62
Breast Cancer	COL11A2	1302	2	1.61
Breast Cancer	ENO2	2026	2	1.61
Breast Cancer	HES6	55502	2	1.58
Breast Cancer	FYN	2534	2	1.56
Breast Cancer	MYO10	4651	2	1.56
Breast Cancer	ABP1	26	2	1.55
Breast Cancer	C21orf5	9980	2	1.55
Breast Cancer	SLC4A8	9498	2	1.54
Breast Cancer	HERC5	51191	2	1.54
Breast Cancer	PCDHB7	56129	2	1.53
Breast Cancer	IFITM1	8519	2	1.52
Breast Cancer	IBSP	3381	2	1.51
Breast Cancer	AXL	558	2	1.51
Breast Cancer	N4BP2	55728	2	1.49
Breast Cancer	PLXNA2	5362	2	1.49
Breast Cancer	EGFL6	25975	2	1.48
Breast Cancer	TIAM1	7074	2	1.47
Breast Cancer	GLRX	2745	2	1.46
Breast Cancer	CRTAC1	55118	2	1.45
Breast Cancer	SLC2A5	6518	2	1.45
Breast Cancer	PPARBP	5469	2	1.45
Breast Cancer	CD163	9332	2	1.45
Breast Cancer	TUBA1	7277	2	1.44
Breast Cancer	TFF2	7032	2	1.43
Breast Cancer	CAMP	820	2	1.42
Breast Cancer	ATP6V1B1	525	2	1.41
Breast Cancer	LYPLA1	10434	2	1.41
Breast Cancer	EEF1A2	1917	2	1.39
Breast Cancer	BFSP2	8419	2	1.37
Breast Cancer	TRA1	7184	2	1.37
Breast Cancer	ARHGDIA	396	2	1.36
Breast Cancer	APP	351	2	1.35
Breast Cancer	BCAS1	8537	2	1.31
Breast Cancer	EFS	10278	2	1.3
Breast Cancer	ARG2	384	2	1.3
Breast Cancer	FAM114A1	92689	2	1.3
Breast Cancer	H2AFV	94239	2	1.29
Breast Cancer	MGAT4A	11320	2	1.29
Breast Cancer	ATP7A	538	2	1.28
Breast Cancer	CDCA7L	55536	2	1.27
Breast Cancer	LTBP1	4052	2	1.26
Breast Cancer	F7	2155	2	1.24
Breast Cancer	LAMC1	3915	2	1.24
Breast Cancer	KCNK5	8645	2	1.23
Breast Cancer	LRP4	4038	2	1.23
Breast Cancer	VDAC3	7419	2	1.2
Breast Cancer	BICD2	23299	2	1.2
Breast Cancer	CHODL	140578	2	1.19
Breast Cancer	ABCC8	6833	2	1.19
Breast Cancer	CST4	1472	2	1.19
Breast Cancer	CEP164	22897	2	1.19
Breast Cancer	ATP6V0A4	50617	2	1.18
Breast Cancer	TM7SF3	51768	2	1.17
Breast Cancer	AATK	9625	2	1.17
Breast Cancer	IGSF4	23705	2	1.16
Breast Cancer	CAST	831	2	1.15
Breast Cancer	NDUFS1	4719	2	1.14
Breast Cancer	COL1A1	1277	2	1.14
Breast Cancer	MLL3	58508	2	1.13
Breast Cancer	RBP5	83758	2	1.13
Breast Cancer	ALCAM	214	2	1.12
Breast Cancer	GRN	2896	2	1.12
Breast Cancer	TACSTD2	4070	2	1.11
Breast Cancer	ARHGAP5	394	2	1.11
Breast Cancer	TSPAN1	10103	2	1.1
Breast Cancer	PLA2R1	22925	2	1.1
Breast Cancer	NES	10763	2	1.1
Breast Cancer	DPYS	1807	2	1.1
Breast Cancer	LOC150383	150383	2	1.1
Breast Cancer	ST3GAL6	10402	2	1.1
Breast Cancer	NULL	114794	2	1.09
Breast Cancer	DSC3	1825	2	1.09
Breast Cancer	ANXA5	308	2	1.09
Breast Cancer	SEZ6L2	26470	2	1.09
Breast Cancer	FAP	2191	2	1.08
Breast Cancer	MYBL1	4603	2	1.08
Breast Cancer	F3	2152	2	1.08
Breast Cancer	CTBS	1486	2	1.07
Breast Cancer	CYCS	54205	2	1.06
Breast Cancer	SNX5	27131	2	1.06
Breast Cancer	AGL	178	2	1.06
Breast Cancer	MSR1	4481	2	1.06
Breast Cancer	YWHAB	7529	2	1.05
Breast Cancer	RAD23A	5886	2	1.05
Breast Cancer	TRH	7200	2	1.03
Breast Cancer	GSTA1	2938	2	1.03
Breast Cancer	PADI2	11240	2	1.03
Breast Cancer	PAFAH1B1	5048	2	1.03
Breast Cancer	SEC63	11231	2	1.03
Breast Cancer	F5	2153	2	1.02
Breast Cancer	CACNA1D	776	2	1.02
Breast Cancer	FAS	355	2	1.01
Breast Cancer	FLNB	2317	2	1.01
Breast Cancer	MASS1	84059	2	1.01
Breast Cancer	FAT2	2196	2	1.01
Breast Cancer	MGC15523	124565	2	1
Breast Cancer	LAP3	51056	2	1
Breast Cancer	PCMT1	5110	2	0.99
Breast Cancer	VAT1	10493	2	0.98
Breast Cancer	GLUL	2752	2	0.97
Breast Cancer	NULL	10404	2	0.97
Breast Cancer	AP3M2	10947	2	0.97
Breast Cancer	TMPRSS4	56649	2	0.97
Breast Cancer	SMC1L1	8243	2	0.97
Breast Cancer	BCAM	4059	2	0.96
Breast Cancer	MYO5C	55930	2	0.95
Breast Cancer	ADH5	128	2	0.95
Breast Cancer	WWP2	11060	2	0.95
Breast Cancer	C12orf2	11228	2	0.95
Breast Cancer	MB	4151	2	0.94
Breast Cancer	CORO1C	23603	2	0.93
Breast Cancer	ENG	2022	2	0.93
Breast Cancer	EMILIN1	11117	2	0.93
Breast Cancer	EPDR1	54749	2	0.92
Breast Cancer	UST	10090	2	0.92
Breast Cancer	ABCA4	24	2	0.92
Breast Cancer	EHD3	30845	2	0.92
Breast Cancer	PLK3	1263	2	0.92
Breast Cancer	KIAA0133	9816	2	0.92
Breast Cancer	XPC	7508	2	0.91
Breast Cancer	CKAP2	26586	2	0.91
Breast Cancer	PLXNB1	5364	2	0.91
Breast Cancer	ECM1	1893	2	0.9
Breast Cancer	ERBB2	2064	2	0.89
Breast Cancer	LRRFIP2	9209	2	0.89
Breast Cancer	DCD	117159	2	0.88
Breast Cancer	VIM	7431	2	0.88
Breast Cancer	PROCR	10544	2	0.88
Breast Cancer	NEO1	4756	2	0.87
Breast Cancer	VNN1	8876	2	0.87
Breast Cancer	PCLO	27445	2	0.86
Breast Cancer	MCM7	4176	2	0.86
Breast Cancer	KIF26A	26153	2	0.86
Breast Cancer	RAB7	7879	2	0.86
Breast Cancer	DOCK1	1793	2	0.86
Breast Cancer	ANKH	56172	2	0.85
Breast Cancer	LYNX1	66004	2	0.85
Breast Cancer	GALNT1	2589	2	0.85
Breast Cancer	SORT1	6272	2	0.85
Breast Cancer	CSNK1A1	1452	2	0.84
Breast Cancer	C1QA	712	2	0.84
Breast Cancer	PRKCL1	5585	2	0.83
Breast Cancer	ADA	100	2	0.82
Breast Cancer	QPCT	25797	2	0.82
Breast Cancer	PDGFA	5154	2	0.81
Breast Cancer	ATRX	546	2	0.81
Breast Cancer	IGFBP2	3485	2	0.78
Breast Cancer	CBR1	873	2	0.78
Breast Cancer	ETS1	2113	2	0.77
Breast Cancer	-	26140	2	0.77
Breast Cancer	GRM4	2914	2	0.76
Breast Cancer	NISCH	11188	2	0.76
Breast Cancer	IL6	3569	2	0.75
Breast Cancer	EDN1	1906	2	0.75
Breast Cancer	BLMH	642	2	0.74
Breast Cancer	SYNE1	23345	2	0.74
Breast Cancer	KIF12	113220	2	0.73
Breast Cancer	CD99L2	83692	2	0.73
Breast Cancer	SCGB1A1	7356	2	0.72
Breast Cancer	SRI	6717	2	0.71
Breast Cancer	SESTD1	91404	2	0.7
Breast Cancer	PCOLCE2	26577	2	0.7
Breast Cancer	SH3BGRL	6451	2	0.7
Breast Cancer	FABP3	2170	2	0.7
Breast Cancer	DSEL	92126	2	0.7
Breast Cancer	C6orf60	79632	2	0.69
Breast Cancer	PEBP4	157310	2	0.69
Breast Cancer	STOM	2040	2	0.68
Breast Cancer	TGOLN2	10618	2	0.68
Breast Cancer	UMOD	7369	2	0.68
Breast Cancer	KIRREL	55243	2	0.67
Breast Cancer	ADAMTS9	56999	2	0.67
Breast Cancer	LDHB	3945	2	0.67
Breast Cancer	RRM1	6240	2	0.67
Breast Cancer	PF4	5196	2	0.66
Breast Cancer	SEZ6L	23544	2	0.66
Breast Cancer	CD3G	917	2	0.66
Breast Cancer	GPC4	2239	2	0.65
Breast Cancer	JUND	3727	2	0.65
Breast Cancer	HEBP1	50865	2	0.65
Breast Cancer	THOC2	57187	2	0.65
Breast Cancer	RGN	9104	2	0.63
Breast Cancer	AMBP	259	2	0.62
Breast Cancer	PLCE1	51196	2	0.62
Breast Cancer	TNNI3	7137	2	0.62
Breast Cancer	IRS1	3667	2	0.62
Breast Cancer	C12orf3	57101	2	0.61
Breast Cancer	MCAM	4162	2	0.61
Breast Cancer	GPRASP1	9737	2	0.6
Breast Cancer	GSTA3	2940	2	0.6
Breast Cancer	PCDH19	57526	2	0.6
Breast Cancer	PEX5L	51555	2	0.59
Breast Cancer	EIF5	1983	2	0.58
Breast Cancer	MGAM	8972	2	0.58
Breast Cancer	PDE5A	8654	2	0.57
Breast Cancer	NCAM2	4685	2	0.57
Breast Cancer	IGSF1	3547	2	0.57
Breast Cancer	LTBP2	4053	2	0.56
Breast Cancer	CAP2	10486	2	0.56
Breast Cancer	PDGFRB	5159	2	0.56
Breast Cancer	NULL	57545	2	0.56
Breast Cancer	NPY5R	4889	2	0.54
Breast Cancer	SPG3A	51062	2	0.54
Breast Cancer	FGF2	2247	2	0.54
Breast Cancer	VLDLR	7436	2	0.53
Breast Cancer	KIAA0913	23053	2	0.53
Breast Cancer	NAV1	89796	2	0.53
Breast Cancer	KCNE1	3753	2	0.53
Breast Cancer	EHD4	30844	2	0.53
Breast Cancer	LFNG	3955	2	0.52
Breast Cancer	APOE	348	2	0.51
Breast Cancer	DLG5	9231	2	0.51
Breast Cancer	TBC1D4	9882	2	0.51
Breast Cancer	RGMA	56963	2	0.51
Breast Cancer	DEFB1	1672	2	0.51
Breast Cancer	STARD13	90627	2	0.5
Breast Cancer	SPTAN1	6709	2	0.5
Breast Cancer	CTNND2	1501	2	0.5
Breast Cancer	ANXA6	309	2	0.5
Breast Cancer	SHANK2	22941	2	0.5
Breast Cancer	SHRM	57619	2	0.49
Breast Cancer	TINAGL1	64129	2	0.49
Breast Cancer	SCPEP1	59342	2	0.49
Breast Cancer	MFGE8	4240	2	0.49
Breast Cancer	TLN1	7094	2	0.48
Breast Cancer	FGL2	10875	2	0.48
Breast Cancer	CFL2	1073	2	0.48
Breast Cancer	ZYX	7791	2	0.48
Breast Cancer	ALDH6A1	4329	2	0.47
Breast Cancer	SASH1	23328	2	0.47
Breast Cancer	HNRPC	3183	2	0.47
Breast Cancer	PAPPA	5069	2	0.47
Breast Cancer	SERPINA1	5265	2	0.46
Breast Cancer	NFASC	23114	2	0.45
Breast Cancer	ECE1	1889	2	0.44
Breast Cancer	OAF	220323	2	0.44
Breast Cancer	TNC	3371	2	0.44
Breast Cancer	RHOB	388	2	0.44
Breast Cancer	ZBTB4	57659	2	0.44
Breast Cancer	DPP4	1803	2	0.44
Breast Cancer	PCOLCE	5118	2	0.43
Breast Cancer	ACADVL	37	2	0.42
Breast Cancer	NBEA	26960	2	0.42
Breast Cancer	TIMP2	7077	2	0.42
Breast Cancer	CPE	1363	2	0.41
Breast Cancer	NR3C1	2908	2	0.41
Breast Cancer	KIF13B	23303	2	0.41
Breast Cancer	CD14	929	2	0.4
Breast Cancer	ARHGDIB	397	2	0.4
Breast Cancer	CALCB	797	2	0.39
Breast Cancer	TACC1	6867	2	0.39
Breast Cancer	ARHGAP20	57569	2	0.39
Breast Cancer	CTSF	8722	2	0.39
Breast Cancer	CD59	966	2	0.38
Breast Cancer	CSAD	51380	2	0.38
Breast Cancer	LAMA4	3910	2	0.38
Breast Cancer	MMP2	4313	2	0.37
Breast Cancer	ITGA9	3680	2	0.35
Breast Cancer	FMOD	2331	2	0.35
Breast Cancer	STEAP4	79689	2	0.34
Breast Cancer	FAM13A1	10144	2	0.34
Breast Cancer	APLP2	334	2	0.34
Breast Cancer	MDK	4192	2	0.34
Breast Cancer	CAT	847	2	0.34
Breast Cancer	MXRA8	54587	2	0.33
Breast Cancer	FAM107A	11170	2	0.32
Breast Cancer	GYPC	2995	2	0.32
Breast Cancer	MYO1C	4641	2	0.31
Breast Cancer	PCDHGC4	56098	2	0.31
Breast Cancer	EFHD1	80303	2	0.31
Breast Cancer	PCDHGA6	56109	2	0.31
Breast Cancer	EDNRB	1910	2	0.31
Breast Cancer	PCDHGC3	5098	2	0.31
Breast Cancer	SH3BGRL2	83699	2	0.3
Breast Cancer	CNTN1	1272	2	0.3
Breast Cancer	OMD	4958	2	0.29
Breast Cancer	PCDH7	5099	2	0.29
Breast Cancer	IGSF4B	57863	2	0.28
Breast Cancer	PTGS2	5743	2	0.27
Breast Cancer	EIF5A	1984	2	0.26
Breast Cancer	NGFR	4804	2	0.25
Breast Cancer	TFF1	7031	2	0.25
Breast Cancer	LUM	4060	2	0.25
Breast Cancer	LAMB2	3913	2	0.25
Breast Cancer	EMCN	51705	2	0.23
Breast Cancer	MYH7	4625	2	0.23
Breast Cancer	LIFR	3977	2	0.22
Breast Cancer	FOLR1	2348	2	0.22
Breast Cancer	MMRN2	79812	2	0.21
Breast Cancer	MST1	4485	2	0.21
Breast Cancer	EPHX2	2053	2	0.2
Breast Cancer	ASAM	79827	2	0.2
Breast Cancer	FBLN1	2192	2	0.2
Breast Cancer	SOD3	6649	2	0.19
Breast Cancer	AKR1B1	231	2	0.19
Breast Cancer	SELENBP1	8991	2	0.18
Breast Cancer	IGF2	3481	2	0.18
Breast Cancer	CLU	1191	2	0.18
Breast Cancer	CD248	57124	2	0.18
Breast Cancer	FBP1	2203	2	0.17
Breast Cancer	PLTP	5360	2	0.17
Breast Cancer	LMOD1	25802	2	0.16
Breast Cancer	FMO2	2327	2	0.15
Breast Cancer	DLK1	8788	2	0.13
Breast Cancer	PTPRB	5787	2	0.13
Breast Cancer	LOC134147	134147	2	0.12
Breast Cancer	ENPEP	2028	2	0.11
Breast Cancer	DPEP1	1800	2	0.1
Breast Cancer	ITIH5	80760	2	0.1
Breast Cancer	CKM	1158	2	0.1
Breast Cancer	ADH1B	125	2	0.09
Breast Cancer	CCL14	6358	2	0.08
Breast Cancer	XLKD1	10894	2	0.07
Breast Cancer	ALB	213	2	0.07
Breast Cancer	SLC1A5	6510	2	0.07
Breast Cancer	TSHR	7253	2	0.05
Breast Cancer	LIPE	3991	2	0.04
Breast Cancer	TNNC2	7125	2	0.04
Breast Cancer	CA3	761	2	0.03
Breast Cancer	CENPE	1062	1	9.92
Breast Cancer	ASPM	259266	1	9.72
Breast Cancer	BLM	641	1	9.49
Breast Cancer	AKAP9	10142	1	8.99
Breast Cancer	KNSL7	56992	1	8.66
Breast Cancer	EZH2	2146	1	8.56
Breast Cancer	ATP1A1	476	1	6.89
Breast Cancer	TACC3	10460	1	6.4
Breast Cancer	KRT75	9119	1	6.32
Breast Cancer	TGFBI	7045	1	6.3
Breast Cancer	ACTN4	81	1	6.19
Breast Cancer	CDC7L1	8317	1	6.16
Breast Cancer	SPINT1	6692	1	6.15
Breast Cancer	NPY	4852	1	59.17
Breast Cancer	SLC6A1	6529	1	5.46
Breast Cancer	KIAA0100	9703	1	5.01
Breast Cancer	SPRR3	6707	1	4.95
Breast Cancer	GALM	130589	1	4.81
Breast Cancer	PGF	5228	1	4.73
Breast Cancer	MSN	4478	1	4.66
Breast Cancer	LYPD2	137797	1	4.6
Breast Cancer	PRKAR2A	5576	1	4.56
Breast Cancer	RNF20	56254	1	4.51
Breast Cancer	GNA14	9630	1	4.5
Breast Cancer	TRIP4	9325	1	4.5
Breast Cancer	NULL	144455	1	4.38
Breast Cancer	PSTPIP1	9051	1	4.32
Breast Cancer	SGOL2	151246	1	4.21
Breast Cancer	FTH1	2495	1	4.17
Breast Cancer	DDX50	79009	1	3.99
Breast Cancer	ENC1	8507	1	3.99
Breast Cancer	ZNF294	26046	1	3.91
Breast Cancer	ACTR2	10097	1	3.9
Breast Cancer	COL8A1	1295	1	3.89
Breast Cancer	PODXL	5420	1	3.88
Breast Cancer	ECGF1	1890	1	3.67
Breast Cancer	GPSM2	29899	1	3.66
Breast Cancer	MTHFD2	10797	1	3.63
Breast Cancer	GALC	2581	1	3.56
Breast Cancer	GNA13	10672	1	3.53
Breast Cancer	TRPM2	7226	1	3.4
Breast Cancer	PKD1	5310	1	3.29
Breast Cancer	RPGRIP1	57096	1	3.29
Breast Cancer	DONSON	29980	1	3.23
Breast Cancer	GPC1	2817	1	3.23
Breast Cancer	S100A6	6277	1	3.21
Breast Cancer	NRAS	4893	1	3.19
Breast Cancer	GAL	51083	1	3.15
Breast Cancer	CAPS	828	1	3.13
Breast Cancer	SOD1	6647	1	3.09
Breast Cancer	STK24	8428	1	3.07
Breast Cancer	LRP8	7804	1	3.07
Breast Cancer	KRT2	3849	1	3.05
Breast Cancer	LYZ	4069	1	3.01
Breast Cancer	PVRL1	5818	1	3
Breast Cancer	CLSTN1	22883	1	2.98
Breast Cancer	PSCD1	9267	1	2.97
Breast Cancer	CHMP1B	57132	1	2.95
Breast Cancer	LRRC8A	56262	1	2.94
Breast Cancer	UCHL5	51377	1	2.93
Breast Cancer	CCL20	6364	1	2.93
Breast Cancer	P15RS	55197	1	2.92
Breast Cancer	ATP6V1C1	528	1	2.91
Breast Cancer	F12	2161	1	2.87
Breast Cancer	TMBIM1	64114	1	2.83
Breast Cancer	SMARCC1	6599	1	2.83
Breast Cancer	HELLS	3070	1	2.82
Breast Cancer	NP	4860	1	2.79
Breast Cancer	NME1	4830	1	2.73
Breast Cancer	HMHA1	23526	1	2.73
Breast Cancer	TPR	7175	1	2.71
Breast Cancer	CLEC7A	64581	1	2.67
Breast Cancer	ACP2	53	1	2.67
Breast Cancer	MUTYH	4595	1	2.67
Breast Cancer	TIMELESS	8914	1	2.65
Breast Cancer	NFATC3	4775	1	2.65
Breast Cancer	LIPG	9388	1	2.65
Breast Cancer	CTTN	2017	1	2.64
Breast Cancer	KRT13	3860	1	2.6
Breast Cancer	ANXA4	307	1	2.6
Breast Cancer	SLC3A2	6520	1	2.58
Breast Cancer	ACTL6A	86	1	2.57
Breast Cancer	TTF2	8458	1	2.56
Breast Cancer	NUFIP2	57532	1	2.55
Breast Cancer	SRRM2	23524	1	2.55
Breast Cancer	MAN2A2	4122	1	2.54
Breast Cancer	MTERFD1	51001	1	2.52
Breast Cancer	OPCML	4978	1	2.52
Breast Cancer	DDAH1	23576	1	2.51
Breast Cancer	FSTL3	10272	1	2.5
Breast Cancer	FGG	2266	1	2.49
Breast Cancer	C12orf48	55010	1	2.49
Breast Cancer	PSMA7	5688	1	2.47
Breast Cancer	GNB1	2782	1	2.46
Breast Cancer	CDH11	1009	1	2.46
Breast Cancer	RBMX	27316	1	2.45
Breast Cancer	KIAA1524	57650	1	2.45
Breast Cancer	COL5A2	1290	1	2.45
Breast Cancer	SDC4	6385	1	2.44
Breast Cancer	SALL4	57167	1	2.44
Breast Cancer	CHMP4B	128866	1	2.43
Breast Cancer	GRIP1	23426	1	2.41
Breast Cancer	RAB10	10890	1	2.4
Breast Cancer	APOC2	344	1	2.4
Breast Cancer	APOC4	346	1	2.4
Breast Cancer	TNFAIP6	7130	1	2.39
Breast Cancer	RANBP2	5903	1	2.38
Breast Cancer	JAK1	3716	1	2.37
Breast Cancer	SECTM1	6398	1	2.37
Breast Cancer	PDXK	8566	1	2.36
Breast Cancer	UBE2V2	7336	1	2.36
Breast Cancer	TRPC6	7225	1	2.35
Breast Cancer	GPX1	2876	1	2.34
Breast Cancer	GPR51	9568	1	2.34
Breast Cancer	LMNB2	84823	1	2.32
Breast Cancer	FETUB	26998	1	2.32
Breast Cancer	LAMB1	3912	1	2.31
Breast Cancer	COCH	1690	1	2.31
Breast Cancer	KNTC1	9735	1	2.3
Breast Cancer	TNFRSF12A	51330	1	2.3
Breast Cancer	SMC6L1	79677	1	2.29
Breast Cancer	ADPRT	142	1	2.29
Breast Cancer	WDR67	93594	1	2.28
Breast Cancer	C15orf42	90381	1	2.27
Breast Cancer	NULL	25909	1	2.27
Breast Cancer	POP1	10940	1	2.27
Breast Cancer	PSMA3	5684	1	2.26
Breast Cancer	ARFGEF2	10564	1	2.25
Breast Cancer	KRT1	3848	1	2.25
Breast Cancer	NAIP	4671	1	2.24
Breast Cancer	TNNT2	7139	1	2.24
Breast Cancer	MLLT11	10962	1	2.23
Breast Cancer	GABPA	2551	1	2.23
Breast Cancer	C8G	733	1	2.22
Breast Cancer	KNG1	3827	1	2.22
Breast Cancer	USP34	9736	1	2.22
Breast Cancer	PSMD14	10213	1	2.22
Breast Cancer	ANXA2	302	1	2.22
Breast Cancer	ARID4B	51742	1	2.22
Breast Cancer	CXXC6	80312	1	2.21
Breast Cancer	NPEPPS	9520	1	2.21
Breast Cancer	MOBK1B	55233	1	2.21
Breast Cancer	KLHL23	151230	1	2.21
Breast Cancer	PSMB1	5689	1	2.21
Breast Cancer	DNA2L	1763	1	2.2
Breast Cancer	LMAN1	3998	1	2.2
Breast Cancer	ITPR3	3710	1	2.19
Breast Cancer	BPNT1	10380	1	2.18
Breast Cancer	CDC42	998	1	2.18
Breast Cancer	GFPT1	2673	1	2.18
Breast Cancer	GNAS	2778	1	2.18
Breast Cancer	CP110	9738	1	2.17
Breast Cancer	PCTK2	5128	1	2.17
Breast Cancer	PLAC3	60676	1	2.16
Breast Cancer	HELZ	9931	1	2.16
Breast Cancer	HSP90AA1	3320	1	2.15
Breast Cancer	SKP1A	6500	1	2.15
Breast Cancer	CST5	1473	1	2.15
Breast Cancer	CILP2	148113	1	2.14
Breast Cancer	KIAA0372	9652	1	2.14
Breast Cancer	EPS8L2	64787	1	2.13
Breast Cancer	HAVCR2	84868	1	2.13
Breast Cancer	TRIP8	221037	1	2.13
Breast Cancer	EFNB1	1947	1	2.12
Breast Cancer	BRCA2	675	1	2.12
Breast Cancer	PRKAR1A	5573	1	2.12
Breast Cancer	HSPA4	3308	1	2.11
Breast Cancer	SDHB	6390	1	2.11
Breast Cancer	MPO	4353	1	2.11
Breast Cancer	SIRT2	22933	1	2.11
Breast Cancer	KPNA4	3840	1	2.11
Breast Cancer	COL4A1	1282	1	2.11
Breast Cancer	SLC4A5	57835	1	2.11
Breast Cancer	CEP350	9857	1	2.1
Breast Cancer	QARS	5859	1	2.1
Breast Cancer	LIMK1	3984	1	2.1
Breast Cancer	AHSG	197	1	2.1
Breast Cancer	B2M	567	1	2.09
Breast Cancer	PCSK1N	27344	1	2.09
Breast Cancer	SH3TC1	54436	1	2.09
Breast Cancer	DNER	92737	1	2.09
Breast Cancer	KIF2A	3796	1	2.09
Breast Cancer	TBL1X	6907	1	2.09
Breast Cancer	FHOD1	29109	1	2.09
Breast Cancer	GOLPH4	27333	1	2.09
Breast Cancer	TMEM132A	54972	1	2.08
Breast Cancer	ITR	160897	1	2.08
Breast Cancer	MBP	4155	1	2.08
Breast Cancer	FTL	2512	1	2.08
Breast Cancer	HRSP12	10247	1	2.07
Breast Cancer	GFRA3	2676	1	2.07
Breast Cancer	ACTR3	10096	1	2.07
Breast Cancer	VEZT	55591	1	2.07
Breast Cancer	NULL	6597	1	2.07
Breast Cancer	SUHW2	140883	1	2.07
Breast Cancer	HSPA5	3309	1	2.07
Breast Cancer	NUP50	10762	1	2.06
Breast Cancer	CSE1L	1434	1	2.06
Breast Cancer	CHRNA4	1137	1	2.06
Breast Cancer	SLC25A32	81034	1	2.05
Breast Cancer	FOXP4	116113	1	2.05
Breast Cancer	TXN	7295	1	2.05
Breast Cancer	ATG7	10533	1	2.05
Breast Cancer	ARPC1B	10095	1	2.04
Breast Cancer	CALR	811	1	2.04
Breast Cancer	BID	637	1	2.03
Breast Cancer	C4orf15	79441	1	2.03
Breast Cancer	SULF2	55959	1	2.03
Breast Cancer	AKT3	10000	1	2.03
Breast Cancer	SLC2A3	6515	1	2.03
Breast Cancer	KIF1A	547	1	2.02
Breast Cancer	FNBP3	55660	1	2.02
Breast Cancer	THRAP1	9969	1	2.02
Breast Cancer	MRPL19	9801	1	2.02
Breast Cancer	GPLD1	2822	1	2.02
Breast Cancer	BRIP1	83990	1	2.02
Breast Cancer	NUDT12	83594	1	2.01
Breast Cancer	MCM3AP	8888	1	2.01
Breast Cancer	C18orf19	125228	1	2.01
Breast Cancer	HSPG2	3339	1	2.01
Breast Cancer	SAMD9	54809	1	2.01
Breast Cancer	PDZD8	118987	1	2.01
Breast Cancer	CCT3	7203	1	2
Breast Cancer	HECW2	57520	1	2
Breast Cancer	MANBA	4126	1	2
Breast Cancer	YWHAG	7532	1	2
Breast Cancer	PSAP	5660	1	19.31
Breast Cancer	COL9A1	1297	1	18.52
Breast Cancer	CDCA1	83540	1	18.24
Breast Cancer	FRK	2444	1	14.58
Breast Cancer	LCP1	3936	1	13.53
Breast Cancer	KIF11	3832	1	10.43
Breast Cancer	LRRC40	55631	1	1.99
Breast Cancer	FCGR3B	2215	1	1.99
Breast Cancer	SLC9A3R1	9368	1	1.99
Breast Cancer	RFX5	5993	1	1.99
Breast Cancer	HPRT1	3251	1	1.99
Breast Cancer	NFATC2IP	84901	1	1.99
Breast Cancer	EEF2	1938	1	1.98
Breast Cancer	ERO1L	30001	1	1.98
Breast Cancer	NULL	9748	1	1.98
Breast Cancer	SOS2	6655	1	1.98
Breast Cancer	F11R	50848	1	1.98
Breast Cancer	TTN	7273	1	1.98
Breast Cancer	SAMD9L	219285	1	1.97
Breast Cancer	EHBP1	23301	1	1.97
Breast Cancer	CDC42BPB	9578	1	1.97
Breast Cancer	BAG2	9532	1	1.97
Breast Cancer	MINK1	50488	1	1.97
Breast Cancer	OMG	4974	1	1.96
Breast Cancer	CPM	1368	1	1.96
Breast Cancer	TCERG1	10915	1	1.96
Breast Cancer	CLEC5A	23601	1	1.96
Breast Cancer	RAB3GAP1	22930	1	1.96
Breast Cancer	HBXAP	51773	1	1.96
Breast Cancer	CXCL5	6374	1	1.96
Breast Cancer	POLRMT	5442	1	1.96
Breast Cancer	C1orf22	80267	1	1.95
Breast Cancer	LARS	51520	1	1.95
Breast Cancer	SMC5L1	23137	1	1.95
Breast Cancer	BIRC3	330	1	1.94
Breast Cancer	NULL	84140	1	1.94
Breast Cancer	SH3GL3	6457	1	1.94
Breast Cancer	C2orf3	6936	1	1.94
Breast Cancer	AZU1	566	1	1.94
Breast Cancer	TOMM34	10953	1	1.93
Breast Cancer	CRHBP	1393	1	1.93
Breast Cancer	HSF1	3297	1	1.93
Breast Cancer	SLC34A1	6569	1	1.93
Breast Cancer	KRTHB6	3892	1	1.93
Breast Cancer	GMPS	8833	1	1.92
Breast Cancer	EIF5B	9669	1	1.92
Breast Cancer	PRKDC	5591	1	1.92
Breast Cancer	RAB25	57111	1	1.92
Breast Cancer	ARL8B	55207	1	1.91
Breast Cancer	SNX27	81609	1	1.91
Breast Cancer	C5	727	1	1.9
Breast Cancer	TAF7	6879	1	1.9
Breast Cancer	WDR36	134430	1	1.9
Breast Cancer	PLEKHA2	59339	1	1.9
Breast Cancer	CXCL3	2921	1	1.9
Breast Cancer	IL1RAP	3556	1	1.9
Breast Cancer	Kua-UEV	387522	1	1.89
Breast Cancer	ALS2CR3	66008	1	1.89
Breast Cancer	FLT1	2321	1	1.89
Breast Cancer	GBP1	2633	1	1.88
Breast Cancer	TAF5L	27097	1	1.88
Breast Cancer	RTN4R	65078	1	1.87
Breast Cancer	CORO2A	7464	1	1.87
Breast Cancer	PDIA4	9601	1	1.87
Breast Cancer	MSH6	2956	1	1.87
Breast Cancer	ARHGEF12	23365	1	1.87
Breast Cancer	HIPK3	10114	1	1.86
Breast Cancer	NME1-NME2	654364	1	1.86
Breast Cancer	CSPG6	9126	1	1.86
Breast Cancer	TPM3	7170	1	1.86
Breast Cancer	SEC10L1	10640	1	1.85
Breast Cancer	SPINT2	10653	1	1.85
Breast Cancer	MAPKAPK2	9261	1	1.85
Breast Cancer	YY1	7528	1	1.85
Breast Cancer	NEDD1	121441	1	1.85
Breast Cancer	RAP1GDS1	5910	1	1.85
Breast Cancer	RAP2C	57826	1	1.85
Breast Cancer	USP13	8975	1	1.85
Breast Cancer	PSMB4	5692	1	1.84
Breast Cancer	CUL5	8065	1	1.84
Breast Cancer	CSTB	1476	1	1.84
Breast Cancer	CAND1	55832	1	1.84
Breast Cancer	LBR	3930	1	1.84
Breast Cancer	MBD5	55777	1	1.84
Breast Cancer	PSMD3	5709	1	1.84
Breast Cancer	TBC1D16	125058	1	1.83
Breast Cancer	FYB	2533	1	1.83
Breast Cancer	LARP2	55132	1	1.83
Breast Cancer	NULL	23218	1	1.83
Breast Cancer	SLC19A1	6573	1	1.83
Breast Cancer	KCNJ6	3763	1	1.83
Breast Cancer	ITGA4	3676	1	1.82
Breast Cancer	CD84	8832	1	1.82
Breast Cancer	SETX	23064	1	1.82
Breast Cancer	GTPBP2	54676	1	1.82
Breast Cancer	SCC-112	23244	1	1.82
Breast Cancer	CPSF3	51692	1	1.81
Breast Cancer	C12orf60	144608	1	1.81
Breast Cancer	RSN	6249	1	1.81
Breast Cancer	ANKTM1	8989	1	1.81
Breast Cancer	LOC284361	284361	1	1.81
Breast Cancer	C17orf37	84299	1	1.81
Breast Cancer	TOR1AIP2	163590	1	1.81
Breast Cancer	CYB561	1534	1	1.8
Breast Cancer	ABCB10	23456	1	1.8
Breast Cancer	SNRPD1	6632	1	1.8
Breast Cancer	PARP9	83666	1	1.8
Breast Cancer	CTGF	1490	1	1.8
Breast Cancer	RAB27A	5873	1	1.8
Breast Cancer	VTA1	51534	1	1.8
Breast Cancer	L1CAM	3897	1	1.79
Breast Cancer	RUVBL1	8607	1	1.79
Breast Cancer	PROM2	150696	1	1.79
Breast Cancer	SLC26A6	65010	1	1.79
Breast Cancer	KPNB1	3837	1	1.79
Breast Cancer	MAN1A2	10905	1	1.79
Breast Cancer	CELSR3	1951	1	1.79
Breast Cancer	C7orf24	79017	1	1.79
Breast Cancer	PROC	5624	1	1.79
Breast Cancer	CP	1356	1	1.79
Breast Cancer	LGALS9	3965	1	1.78
Breast Cancer	CCDC93	54520	1	1.78
Breast Cancer	NOP5/NOP58	51602	1	1.77
Breast Cancer	PDCD10	11235	1	1.76
Breast Cancer	TERF1	7013	1	1.76
Breast Cancer	NAPRT1	93100	1	1.76
Breast Cancer	GAST	2520	1	1.76
Breast Cancer	MYO6	4646	1	1.75
Breast Cancer	KCNQ2	3785	1	1.75
Breast Cancer	HSPE1	3336	1	1.75
Breast Cancer	IKBKE	9641	1	1.75
Breast Cancer	AKAP13	11214	1	1.75
Breast Cancer	SART3	9733	1	1.75
Breast Cancer	DIAPH1	1729	1	1.75
Breast Cancer	SLC5A1	6523	1	1.75
Breast Cancer	NEK1	4750	1	1.74
Breast Cancer	FACL6	23305	1	1.74
Breast Cancer	ERCC3	2071	1	1.74
Breast Cancer	CAPRIN1	4076	1	1.73
Breast Cancer	AGC1	176	1	1.73
Breast Cancer	FOSL1	8061	1	1.73
Breast Cancer	GOT2	2806	1	1.73
Breast Cancer	PSMD1	5707	1	1.73
Breast Cancer	PPFIA1	8500	1	1.73
Breast Cancer	SPHK1	8877	1	1.73
Breast Cancer	CPNE3	8895	1	1.73
Breast Cancer	YWHAZ	7534	1	1.73
Breast Cancer	VIL2	7430	1	1.73
Breast Cancer	PPP1CB	5500	1	1.73
Breast Cancer	PHC3	80012	1	1.73
Breast Cancer	BRAF	673	1	1.72
Breast Cancer	WIPF1	7456	1	1.72
Breast Cancer	KIAA0152	9761	1	1.72
Breast Cancer	NPPC	4880	1	1.72
Breast Cancer	NEK6	10783	1	1.72
Breast Cancer	TPM4	7171	1	1.72
Breast Cancer	KIAA1549	57670	1	1.72
Breast Cancer	FBXO31	79791	1	1.71
Breast Cancer	NSD1	64324	1	1.71
Breast Cancer	FSHB	2488	1	1.71
Breast Cancer	ZNF93	81931	1	1.71
Breast Cancer	UTY	7404	1	1.71
Breast Cancer	IL2RA	3559	1	1.71
Breast Cancer	HTR7	3363	1	1.71
Breast Cancer	TTC9	23508	1	1.71
Breast Cancer	MIB1	57534	1	1.7
Breast Cancer	CYC1	1537	1	1.7
Breast Cancer	SDAD1	55153	1	1.7
Breast Cancer	GSTA2	2939	1	1.7
Breast Cancer	LXN	56925	1	1.7
Breast Cancer	CASK	8573	1	1.7
Breast Cancer	SPAG9	9043	1	1.7
Breast Cancer	HPCA	3208	1	1.7
Breast Cancer	NULL	255403	1	1.7
Breast Cancer	ERC1	23085	1	1.7
Breast Cancer	MYOHD1	80179	1	1.7
Breast Cancer	ACE	1636	1	1.7
Breast Cancer	TNR	7143	1	1.69
Breast Cancer	TCF3	6929	1	1.69
Breast Cancer	THRAP6	90390	1	1.69
Breast Cancer	TTR	7276	1	1.69
Breast Cancer	MPHOSPH1	9585	1	1.69
Breast Cancer	SLC5A5	6528	1	1.69
Breast Cancer	SAE2	10054	1	1.69
Breast Cancer	RAC1	5879	1	1.69
Breast Cancer	ADNP	23394	1	1.68
Breast Cancer	OSBPL11	114885	1	1.68
Breast Cancer	DDX31	64794	1	1.68
Breast Cancer	ZNF33A	7581	1	1.68
Breast Cancer	CCDC99	54908	1	1.68
Breast Cancer	EFNA1	1942	1	1.68
Breast Cancer	DMXL2	23312	1	1.68
Breast Cancer	CEL	1056	1	1.68
Breast Cancer	PVRL4	81607	1	1.67
Breast Cancer	TPI1	7167	1	1.67
Breast Cancer	C9orf19	152007	1	1.67
Breast Cancer	EXOC8	149371	1	1.67
Breast Cancer	DDHD1	80821	1	1.67
Breast Cancer	TMED7	51014	1	1.67
Breast Cancer	ALDOB	229	1	1.67
Breast Cancer	STAU2	27067	1	1.67
Breast Cancer	WHSC1L1	54904	1	1.66
Breast Cancer	C18orf54	162681	1	1.66
Breast Cancer	PRKCBP1	23613	1	1.66
Breast Cancer	CTSB	1508	1	1.66
Breast Cancer	SF3B1	23451	1	1.66
Breast Cancer	PIK3CB	5291	1	1.66
Breast Cancer	SNX8	29886	1	1.66
Breast Cancer	CEP135	9662	1	1.65
Breast Cancer	UBE3A	7337	1	1.65
Breast Cancer	PLXNA3	55558	1	1.65
Breast Cancer	RAD18	56852	1	1.65
Breast Cancer	FOXRED2	80020	1	1.65
Breast Cancer	CCDC112	153733	1	1.64
Breast Cancer	HERC1	8925	1	1.64
Breast Cancer	NUDT1	4521	1	1.64
Breast Cancer	KIF3A	11127	1	1.64
Breast Cancer	RPS6KB1	6198	1	1.64
Breast Cancer	ATF7IP	55729	1	1.64
Breast Cancer	GHRH	2691	1	1.64
Breast Cancer	DNMT1	1786	1	1.64
Breast Cancer	PON1	5444	1	1.63
Breast Cancer	HSPD1	3329	1	1.63
Breast Cancer	PIGW	284098	1	1.63
Breast Cancer	ABCC4	10257	1	1.63
Breast Cancer	PSMB2	5690	1	1.63
Breast Cancer	TAGLN2	8407	1	1.63
Breast Cancer	CDC10	989	1	1.62
Breast Cancer	CCDC106	29903	1	1.62
Breast Cancer	RAB11B	9230	1	1.62
Breast Cancer	MALT1	10892	1	1.62
Breast Cancer	TXNRD1	7296	1	1.62
Breast Cancer	GRLF1	2909	1	1.62
Breast Cancer	UBN1	29855	1	1.62
Breast Cancer	RDX	5962	1	1.62
Breast Cancer	KDELR2	11014	1	1.62
Breast Cancer	PROZ	8858	1	1.61
Breast Cancer	MSH3	4437	1	1.61
Breast Cancer	ATP2B3	492	1	1.61
Breast Cancer	PGLS	25796	1	1.6
Breast Cancer	RHPN2	85415	1	1.6
Breast Cancer	EPB41L3	23136	1	1.6
Breast Cancer	VWA1	64856	1	1.6
Breast Cancer	RNASEL	6041	1	1.59
Breast Cancer	GSS	2937	1	1.59
Breast Cancer	MAG	4099	1	1.59
Breast Cancer	RPS6KC1	26750	1	1.59
Breast Cancer	RFTN1	23180	1	1.59
Breast Cancer	PROK2	60675	1	1.59
Breast Cancer	CD2AP	23607	1	1.58
Breast Cancer	MASP2	10747	1	1.58
Breast Cancer	LRP6	4040	1	1.58
Breast Cancer	SERPINB2	5055	1	1.58
Breast Cancer	BPGM	669	1	1.58
Breast Cancer	IFNG	3458	1	1.58
Breast Cancer	MAN2B1	4125	1	1.58
Breast Cancer	SLURP1	57152	1	1.57
Breast Cancer	CSPG5	10675	1	1.57
Breast Cancer	MAD1L1	8379	1	1.57
Breast Cancer	GRM8	2918	1	1.57
Breast Cancer	GABRA4	2557	1	1.57
Breast Cancer	TXNL5	84817	1	1.57
Breast Cancer	TNFRSF17	608	1	1.57
Breast Cancer	ARPC3	10094	1	1.57
Breast Cancer	ACE2	59272	1	1.57
Breast Cancer	CDH2	1000	1	1.56
Breast Cancer	GUCA2B	2981	1	1.56
Breast Cancer	KRTHA6	8689	1	1.56
Breast Cancer	SLC30A5	64924	1	1.56
Breast Cancer	BRF1	2972	1	1.56
Breast Cancer	SAC	55811	1	1.55
Breast Cancer	GSR	2936	1	1.55
Breast Cancer	PTPN3	5774	1	1.55
Breast Cancer	CALB2	794	1	1.55
Breast Cancer	SCNN1G	6340	1	1.55
Breast Cancer	PVRL2	5819	1	1.55
Breast Cancer	KRT19	3880	1	1.55
Breast Cancer	PLCB2	5330	1	1.55
Breast Cancer	RAP2B	5912	1	1.54
Breast Cancer	SRPR	6734	1	1.54
Breast Cancer	C1QB	713	1	1.54
Breast Cancer	BHMT	635	1	1.54
Breast Cancer	IVL	3713	1	1.54
Breast Cancer	RNASE3	6037	1	1.54
Breast Cancer	GTF2I	2969	1	1.54
Breast Cancer	HLA-C	3107	1	1.53
Breast Cancer	CD27	939	1	1.53
Breast Cancer	GNAI3	2773	1	1.53
Breast Cancer	ANKRD26	22852	1	1.53
Breast Cancer	TNF	7124	1	1.53
Breast Cancer	ADAR	103	1	1.53
Breast Cancer	KIF1B	23095	1	1.52
Breast Cancer	CANT1	124583	1	1.52
Breast Cancer	F2	2147	1	1.51
Breast Cancer	LILRA5	353514	1	1.51
Breast Cancer	SAG	6295	1	1.51
Breast Cancer	SIAT8A	6489	1	1.5
Breast Cancer	FASLG	356	1	1.5
Breast Cancer	FKBP1A	2280	1	1.49
Breast Cancer	SREBF2	6721	1	1.49
Breast Cancer	MATR3	9782	1	1.48
Breast Cancer	APOA2	336	1	1.47
Breast Cancer	CD276	80381	1	1.47
Breast Cancer	SPAG4	6676	1	1.46
Breast Cancer	STE	6783	1	1.46
Breast Cancer	ADAM12	8038	1	1.45
Breast Cancer	FGA	2243	1	1.45
Breast Cancer	ARF1	375	1	1.45
Breast Cancer	CKAP5	9793	1	1.45
Breast Cancer	SPTLC2	9517	1	1.44
Breast Cancer	SLC29A2	3177	1	1.44
Breast Cancer	CR2	1380	1	1.43
Breast Cancer	PLA2G2A	5320	1	1.43
Breast Cancer	C2	717	1	1.43
Breast Cancer	KRT4	3851	1	1.42
Breast Cancer	APXL	357	1	1.42
Breast Cancer	DRB1	129831	1	1.41
Breast Cancer	PURA	5813	1	1.41
Breast Cancer	CLCNKA	1187	1	1.41
Breast Cancer	SELP	6403	1	1.4
Breast Cancer	BANK1	55024	1	1.4
Breast Cancer	DSPP	1834	1	1.38
Breast Cancer	SPINK1	6690	1	1.38
Breast Cancer	THPO	7066	1	1.36
Breast Cancer	VSIG4	11326	1	1.36
Breast Cancer	LY9	4063	1	1.36
Breast Cancer	ADAMTS12	81792	1	1.35
Breast Cancer	IMPA2	3613	1	1.34
Breast Cancer	BRDT	676	1	1.34
Breast Cancer	CCL22	6367	1	1.34
Breast Cancer	ACTC	70	1	1.33
Breast Cancer	PRSS8	5652	1	1.33
Breast Cancer	CTAGE5	4253	1	1.33
Breast Cancer	SLC21A3	6579	1	1.3
Breast Cancer	RPS6KA1	6195	1	1.3
Breast Cancer	CTSZ	1522	1	1.29
Breast Cancer	NULL	57530	1	1.27
Breast Cancer	SFTPD	6441	1	1.27
Breast Cancer	CACNA1A	773	1	1.26
Breast Cancer	SCARB2	950	1	1.26
Breast Cancer	ROR2	4920	1	1.26
Breast Cancer	UGDH	7358	1	1.25
Breast Cancer	KLRK1	22914	1	1.25
Breast Cancer	PLS3	5358	1	1.23
Breast Cancer	IL2RB	3560	1	1.22
Breast Cancer	GDF15	9518	1	1.19
Breast Cancer	COLEC11	78989	1	1.13
Breast Cancer	BST2	684	1	1.12
Breast Cancer	CECR2	27443	1	1.09
Breast Cancer	CILP	8483	1	1.09
Breast Cancer	NKTR	4820	1	1.07
Breast Cancer	THBS2	7058	1	1.02
Breast Cancer	BRLZ	283234	1	0.96
Breast Cancer	PLA2G4C	8605	1	0.95
Breast Cancer	PANX2	56666	1	0.91
Breast Cancer	N4BP1	9683	1	0.87
Breast Cancer	CYP27A1	1593	1	0.84
Breast Cancer	BCAN	63827	1	0.82
Breast Cancer	C6orf96	55005	1	0.82
Breast Cancer	CNTFR	1271	1	0.8
Breast Cancer	KIAA1772	80000	1	0.8
Breast Cancer	SPEN	23013	1	0.8
Breast Cancer	PFN2	5217	1	0.79
Breast Cancer	PTPRK	5796	1	0.77
Breast Cancer	HMBOX1	79618	1	0.74
Breast Cancer	MYO15A	51168	1	0.74
Breast Cancer	GCC2	9648	1	0.74
Breast Cancer	DIAPH2	1730	1	0.74
Breast Cancer	RAB3B	5865	1	0.74
Breast Cancer	SPTBN5	51332	1	0.73
Breast Cancer	PAWR	5074	1	0.72
Breast Cancer	RAB27B	5874	1	0.72
Breast Cancer	RPS15A	6210	1	0.72
Breast Cancer	SFRS8	6433	1	0.72
Breast Cancer	HYDIN	54768	1	0.7
Breast Cancer	IGLL1	3543	1	0.7
Breast Cancer	ENPP4	22875	1	0.7
Breast Cancer	FMR1	2332	1	0.69
Breast Cancer	CPNE8	144402	1	0.69
Breast Cancer	PPIC	5480	1	0.69
Breast Cancer	BAZ2B	29994	1	0.69
Breast Cancer	MORC3	23515	1	0.69
Breast Cancer	ANXA13	312	1	0.68
Breast Cancer	GDI2	2665	1	0.67
Breast Cancer	TALDO1	6888	1	0.67
Breast Cancer	CRYGA	1418	1	0.67
Breast Cancer	ALDH2	217	1	0.67
Breast Cancer	BASP1	10409	1	0.67
Breast Cancer	NULL	6845	1	0.67
Breast Cancer	NULL	22837	1	0.66
Breast Cancer	NULL	23392	1	0.66
Breast Cancer	CRYZ	1429	1	0.66
Breast Cancer	ST13	6767	1	0.66
Breast Cancer	IDH3G	3421	1	0.66
Breast Cancer	ASL	435	1	0.66
Breast Cancer	PLD4	122618	1	0.66
Breast Cancer	TKT	7086	1	0.66
Breast Cancer	CAPZA2	830	1	0.65
Breast Cancer	STXBP3	6814	1	0.65
Breast Cancer	PPP1R9B	84687	1	0.65
Breast Cancer	TPP1	1200	1	0.65
Breast Cancer	STX7	8417	1	0.64
Breast Cancer	CST2	1470	1	0.64
Breast Cancer	CAPNS1	826	1	0.64
Breast Cancer	COL27A1	85301	1	0.64
Breast Cancer	NULL	125476	1	0.64
Breast Cancer	PCBD1	5092	1	0.64
Breast Cancer	MRPS15	64960	1	0.64
Breast Cancer	FUBP1	8880	1	0.64
Breast Cancer	DDT	1652	1	0.64
Breast Cancer	SORD	6652	1	0.63
Breast Cancer	VPS28	51160	1	0.63
Breast Cancer	ARSB	411	1	0.63
Breast Cancer	SRGAP3	9901	1	0.63
Breast Cancer	GHRL	51738	1	0.63
Breast Cancer	RRBP1	6238	1	0.63
Breast Cancer	ZNF274	10782	1	0.63
Breast Cancer	CNDP1	84735	1	0.63
Breast Cancer	KRTHA3B	3884	1	0.62
Breast Cancer	CAB39	51719	1	0.62
Breast Cancer	FEZ2	9637	1	0.62
Breast Cancer	ADAMTS3	9508	1	0.62
Breast Cancer	RAB5B	5869	1	0.62
Breast Cancer	USP8	9101	1	0.62
Breast Cancer	XPNPEP2	7512	1	0.62
Breast Cancer	PMM1	5372	1	0.62
Breast Cancer	KIAA0423	23116	1	0.62
Breast Cancer	SAMM50	25813	1	0.62
Breast Cancer	LOC196463	196463	1	0.61
Breast Cancer	NOTCH2	4853	1	0.61
Breast Cancer	CNDP2	55748	1	0.61
Breast Cancer	ADAMTSL4	54507	1	0.61
Breast Cancer	ITM2B	9445	1	0.61
Breast Cancer	NULL	196527	1	0.61
Breast Cancer	ARHGAP24	83478	1	0.6
Breast Cancer	CNTF	1270	1	0.6
Breast Cancer	CD4	920	1	0.6
Breast Cancer	FLII	2314	1	0.6
Breast Cancer	UGP2	7360	1	0.6
Breast Cancer	SUPT5H	6829	1	0.6
Breast Cancer	ZNF512	84450	1	0.6
Breast Cancer	VDAC1	7416	1	0.6
Breast Cancer	C11orf54	28970	1	0.59
Breast Cancer	NULL	91461	1	0.59
Breast Cancer	ATRN	8455	1	0.59
Breast Cancer	NAP1L4	4676	1	0.59
Breast Cancer	GNS	2799	1	0.59
Breast Cancer	C17orf38	146850	1	0.59
Breast Cancer	FLOT2	2319	1	0.58
Breast Cancer	NULL	139818	1	0.58
Breast Cancer	C6orf72	116254	1	0.58
Breast Cancer	ZNF598	90850	1	0.57
Breast Cancer	TMEM46	387914	1	0.57
Breast Cancer	CD99	4267	1	0.57
Breast Cancer	EPS8	2059	1	0.57
Breast Cancer	ASAHL	27163	1	0.57
Breast Cancer	LGALS3	3958	1	0.57
Breast Cancer	COL6A2	1292	1	0.56
Breast Cancer	ESAM	90952	1	0.56
Breast Cancer	AP1M1	8907	1	0.56
Breast Cancer	NPC2	10577	1	0.56
Breast Cancer	SBDS	51119	1	0.56
Breast Cancer	UBTF	7343	1	0.56
Breast Cancer	RGS7	6000	1	0.56
Breast Cancer	BCHE	590	1	0.55
Breast Cancer	PDK1	5163	1	0.55
Breast Cancer	MYH9	4627	1	0.55
Breast Cancer	CACNA2D1	781	1	0.55
Breast Cancer	GGA2	23062	1	0.54
Breast Cancer	SERPINB6	5269	1	0.53
Breast Cancer	MGAT3	4248	1	0.52
Breast Cancer	CS	1431	1	0.52
Breast Cancer	GPX4	2879	1	0.52
Breast Cancer	CASP8	841	1	0.52
Breast Cancer	ACO2	50	1	0.52
Breast Cancer	CD93	22918	1	0.51
Breast Cancer	MGAT1	4245	1	0.51
Breast Cancer	EPHB6	2051	1	0.51
Breast Cancer	DBI	1622	1	0.5
Breast Cancer	TEK	7010	1	0.5
Breast Cancer	NEB	4703	1	0.5
Breast Cancer	PNLIP	5406	1	0.5
Breast Cancer	GOLGA4	2803	1	0.49
Breast Cancer	CYP11A1	1583	1	0.49
Breast Cancer	ADCY6	112	1	0.49
Breast Cancer	HADHA	3030	1	0.49
Breast Cancer	NEFL	4747	1	0.49
Breast Cancer	PTTG1IP	754	1	0.48
Breast Cancer	MAP2K2	5605	1	0.48
Breast Cancer	FAT4	79633	1	0.48
Breast Cancer	TLN2	83660	1	0.48
Breast Cancer	CD40	958	1	0.48
Breast Cancer	ALDH1L1	10840	1	0.48
Breast Cancer	GANC	2595	1	0.47
Breast Cancer	CTSH	1512	1	0.47
Breast Cancer	RAMP3	10268	1	0.47
Breast Cancer	IFT88	8100	1	0.47
Breast Cancer	MAPK7	5598	1	0.47
Breast Cancer	PCDHB4	56131	1	0.47
Breast Cancer	AP2A2	161	1	0.47
Breast Cancer	C1QG	714	1	0.47
Breast Cancer	EPOR	2057	1	0.47
Breast Cancer	MMAB	326625	1	0.46
Breast Cancer	COL4A2	1284	1	0.46
Breast Cancer	TGFB1	7040	1	0.46
Breast Cancer	DPYSL3	1809	1	0.46
Breast Cancer	APOA1	335	1	0.46
Breast Cancer	SAFB2	9667	1	0.46
Breast Cancer	DMPK	1760	1	0.46
Breast Cancer	IL28RA	163702	1	0.46
Breast Cancer	IKBKB	3551	1	0.46
Breast Cancer	NAPSA	9476	1	0.46
Breast Cancer	TMEM25	84866	1	0.46
Breast Cancer	KREMEN1	83999	1	0.46
Breast Cancer	RTN4RL1	146760	1	0.46
Breast Cancer	TNRC11	9968	1	0.46
Breast Cancer	C6orf120	387263	1	0.46
Breast Cancer	C10orf38	221061	1	0.46
Breast Cancer	SIAE	54414	1	0.45
Breast Cancer	PTCH	5727	1	0.45
Breast Cancer	GCSH	2653	1	0.45
Breast Cancer	KIAA0494	9813	1	0.45
Breast Cancer	CCNG2	901	1	0.45
Breast Cancer	PRKG1	5592	1	0.45
Breast Cancer	NQO2	4835	1	0.45
Breast Cancer	COL7A1	1294	1	0.45
Breast Cancer	CC2D1A	54862	1	0.45
Breast Cancer	DNAH1	25981	1	0.45
Breast Cancer	SYNE2	23224	1	0.45
Breast Cancer	ESD	2098	1	0.44
Breast Cancer	HFL1	3078	1	0.44
Breast Cancer	OGDH	4967	1	0.44
Breast Cancer	CCNL2	81669	1	0.44
Breast Cancer	PER3	8863	1	0.44
Breast Cancer	CLN5	1203	1	0.44
Breast Cancer	NBR1	4077	1	0.44
Breast Cancer	PDCD6IP	10015	1	0.44
Breast Cancer	TRDN	10345	1	0.44
Breast Cancer	BIN1	274	1	0.44
Breast Cancer	NR1D1	9572	1	0.44
Breast Cancer	LIF	3976	1	0.44
Breast Cancer	FLJ39501	126410	1	0.44
Breast Cancer	STAT3	6774	1	0.44
Breast Cancer	C5orf7	51780	1	0.44
Breast Cancer	AFP	174	1	0.44
Breast Cancer	EPS15	2060	1	0.44
Breast Cancer	SMTN	6525	1	0.44
Breast Cancer	PDZGEF1	9693	1	0.44
Breast Cancer	DAAM1	23002	1	0.43
Breast Cancer	PRDM2	7799	1	0.43
Breast Cancer	ITGA5	3678	1	0.43
Breast Cancer	SLC13A2	9058	1	0.43
Breast Cancer	TJP2	9414	1	0.43
Breast Cancer	ACADM	34	1	0.43
Breast Cancer	C20orf3	57136	1	0.43
Breast Cancer	ACAT1	38	1	0.43
Breast Cancer	SLITL2	114990	1	0.43
Breast Cancer	ABCC3	8714	1	0.43
Breast Cancer	ALDH7A1	501	1	0.43
Breast Cancer	ZNF91	7644	1	0.43
Breast Cancer	C10orf128	170371	1	0.43
Breast Cancer	ITGA8	8516	1	0.43
Breast Cancer	KIAA0182	23199	1	0.43
Breast Cancer	CHP	11261	1	0.43
Breast Cancer	APOBEC1	339	1	0.43
Breast Cancer	CNTNAP3	79937	1	0.42
Breast Cancer	KIAA0232	9778	1	0.42
Breast Cancer	GNA11	2767	1	0.42
Breast Cancer	APBA1	320	1	0.42
Breast Cancer	PDE4B	5142	1	0.42
Breast Cancer	FBXO32	114907	1	0.42
Breast Cancer	DECR1	1666	1	0.42
Breast Cancer	C1orf34	22996	1	0.42
Breast Cancer	WDFY3	23001	1	0.42
Breast Cancer	B3GNT6	11041	1	0.42
Breast Cancer	SAA4	6291	1	0.42
Breast Cancer	LOC124220	124220	1	0.42
Breast Cancer	MYH10	4628	1	0.42
Breast Cancer	AKAP10	11216	1	0.42
Breast Cancer	DES	1674	1	0.42
Breast Cancer	SFRS4	6429	1	0.42
Breast Cancer	GUSB	2990	1	0.41
Breast Cancer	SGSH	6448	1	0.41
Breast Cancer	MZF1	7593	1	0.41
Breast Cancer	BBS1	582	1	0.41
Breast Cancer	HMCN1	83872	1	0.41
Breast Cancer	POLR2A	5430	1	0.41
Breast Cancer	IGBP1	3476	1	0.41
Breast Cancer	SFRS11	9295	1	0.4
Breast Cancer	KITLG	4254	1	0.4
Breast Cancer	VCL	7414	1	0.4
Breast Cancer	BANF1	8815	1	0.4
Breast Cancer	KCTD1	284252	1	0.4
Breast Cancer	BCL6	604	1	0.4
Breast Cancer	GPRK6	2870	1	0.4
Breast Cancer	ACO1	48	1	0.39
Breast Cancer	PLEC1	5339	1	0.39
Breast Cancer	SNF1LK	150094	1	0.39
Breast Cancer	GGT6	124975	1	0.39
Breast Cancer	CAPN3	825	1	0.39
Breast Cancer	ELN	2006	1	0.39
Breast Cancer	LAMA1	284217	1	0.39
Breast Cancer	MAN1C1	57134	1	0.39
Breast Cancer	TP53	7157	1	0.39
Breast Cancer	DMBT1	1755	1	0.39
Breast Cancer	IL6R	3570	1	0.38
Breast Cancer	NUMA1	4926	1	0.38
Breast Cancer	MLL	4297	1	0.38
Breast Cancer	GLA	2717	1	0.38
Breast Cancer	NFATC2	4773	1	0.38
Breast Cancer	TARDBP	23435	1	0.38
Breast Cancer	SMARCA1	6594	1	0.38
Breast Cancer	DDAH2	23564	1	0.38
Breast Cancer	ATP2A2	488	1	0.38
Breast Cancer	KIAA1967	57805	1	0.38
Breast Cancer	TGFBR1	7046	1	0.38
Breast Cancer	SMARCA2	6595	1	0.38
Breast Cancer	BBS2	583	1	0.38
Breast Cancer	CD209	30835	1	0.38
Breast Cancer	FDFT1	2222	1	0.38
Breast Cancer	C11orf52	91894	1	0.37
Breast Cancer	TMOD2	29767	1	0.37
Breast Cancer	ZNF703	80139	1	0.37
Breast Cancer	NCOR2	9612	1	0.37
Breast Cancer	VAMP2	6844	1	0.37
Breast Cancer	TXNDC13	56255	1	0.37
Breast Cancer	EIF4EBP2	1979	1	0.37
Breast Cancer	NULL	79659	1	0.37
Breast Cancer	MYH2	4620	1	0.37
Breast Cancer	PECAM1	5175	1	0.37
Breast Cancer	FABP1	2168	1	0.37
Breast Cancer	NFAT5	10725	1	0.37
Breast Cancer	HSPB1	3315	1	0.36
Breast Cancer	MAML3	55534	1	0.36
Breast Cancer	EPB41L2	2037	1	0.36
Breast Cancer	TEF	7008	1	0.36
Breast Cancer	GC	2638	1	0.36
Breast Cancer	PREX1	57580	1	0.36
Breast Cancer	TNFRSF1A	7132	1	0.36
Breast Cancer	GYS2	2998	1	0.36
Breast Cancer	PTBP1	5725	1	0.36
Breast Cancer	XRN2	22803	1	0.36
Breast Cancer	LCAT	3931	1	0.35
Breast Cancer	PCDH16	8642	1	0.35
Breast Cancer	CREBBP	1387	1	0.35
Breast Cancer	EZH1	2145	1	0.35
Breast Cancer	ISLR	3671	1	0.35
Breast Cancer	BDH2	56898	1	0.35
Breast Cancer	GNG7	2788	1	0.35
Breast Cancer	STK10	6793	1	0.34
Breast Cancer	76P	27229	1	0.34
Breast Cancer	FNBP1	23048	1	0.34
Breast Cancer	MDH1	4190	1	0.34
Breast Cancer	CARD10	29775	1	0.34
Breast Cancer	SCG5	6447	1	0.34
Breast Cancer	PRRX1	5396	1	0.34
Breast Cancer	CTSD	1509	1	0.34
Breast Cancer	USP53	54532	1	0.34
Breast Cancer	LIMA1	51474	1	0.34
Breast Cancer	FZD1	8321	1	0.34
Breast Cancer	LTBP3	4054	1	0.34
Breast Cancer	ROBO4	54538	1	0.34
Breast Cancer	ZFHX4	79776	1	0.34
Breast Cancer	EFEMP2	30008	1	0.34
Breast Cancer	SR-A1	58506	1	0.34
Breast Cancer	SCN10A	6336	1	0.34
Breast Cancer	SYTL5	94122	1	0.34
Breast Cancer	SH3RF2	153769	1	0.33
Breast Cancer	ROR1	4919	1	0.33
Breast Cancer	PELO	53918	1	0.33
Breast Cancer	PGC	5225	1	0.33
Breast Cancer	AUTS2	26053	1	0.33
Breast Cancer	GATM	2628	1	0.33
Breast Cancer	EHD1	10938	1	0.32
Breast Cancer	RNASE1	6035	1	0.32
Breast Cancer	S100A13	6284	1	0.32
Breast Cancer	NCK1	4690	1	0.32
Breast Cancer	PTPRD	5789	1	0.32
Breast Cancer	ABHD14B	84836	1	0.32
Breast Cancer	S100A4	6275	1	0.32
Breast Cancer	MSRA	4482	1	0.31
Breast Cancer	PLXDC1	57125	1	0.31
Breast Cancer	PCCA	5095	1	0.31
Breast Cancer	MT1X	4501	1	0.31
Breast Cancer	STAB1	23166	1	0.31
Breast Cancer	FAM70A	55026	1	0.3
Breast Cancer	DNMBP	23268	1	0.3
Breast Cancer	PCNX	22990	1	0.3
Breast Cancer	ACACA	31	1	0.3
Breast Cancer	ST5	6764	1	0.3
Breast Cancer	PCM1	5108	1	0.3
Breast Cancer	PDGFC	56034	1	0.29
Breast Cancer	LY6D	8581	1	0.29
Breast Cancer	PFC	5199	1	0.29
Breast Cancer	A2M	2	1	0.29
Breast Cancer	MOCS2	4338	1	0.29
Breast Cancer	IL2RG	3561	1	0.29
Breast Cancer	FLT4	2324	1	0.29
Breast Cancer	STAT5B	6777	1	0.28
Breast Cancer	RGS2	5997	1	0.28
Breast Cancer	PPP2R5D	5528	1	0.28
Breast Cancer	ANG	283	1	0.28
Breast Cancer	GPD1L	23171	1	0.28
Breast Cancer	FER1L3	26509	1	0.28
Breast Cancer	LAF4	3899	1	0.28
Breast Cancer	ALPL	249	1	0.27
Breast Cancer	RERE	473	1	0.27
Breast Cancer	CFH	3075	1	0.27
Breast Cancer	GGT1	2678	1	0.27
Breast Cancer	KIAA1217	56243	1	0.27
Breast Cancer	AR	367	1	0.27
Breast Cancer	NT5C2	22978	1	0.27
Breast Cancer	PLVAP	83483	1	0.26
Breast Cancer	ZD52F10	93099	1	0.26
Breast Cancer	ASGR2	433	1	0.26
Breast Cancer	HAL	3034	1	0.26
Breast Cancer	FAH	2184	1	0.26
Breast Cancer	IGFBP7	3490	1	0.25
Breast Cancer	PPL	5493	1	0.25
Breast Cancer	FRY	10129	1	0.25
Breast Cancer	SLIT3	6586	1	0.24
Breast Cancer	SCRN2	90507	1	0.24
Breast Cancer	PDE1C	5137	1	0.24
Breast Cancer	PARD3	56288	1	0.24
Breast Cancer	EEF1A1	1915	1	0.23
Breast Cancer	C4BPA	722	1	0.23
Breast Cancer	GPT	2875	1	0.23
Breast Cancer	TFPI	7035	1	0.23
Breast Cancer	EPB41L4A	64097	1	0.23
Breast Cancer	PHGDH	26227	1	0.21
Breast Cancer	CORO1A	11151	1	0.21
Breast Cancer	FBN1	2200	1	0.21
Breast Cancer	GAS6	2621	1	0.21
Breast Cancer	GDA	9615	1	0.21
Breast Cancer	LAYN	143903	1	0.2
Breast Cancer	NULL	196996	1	0.2
Breast Cancer	SLIT2	9353	1	0.19
Breast Cancer	RECK	8434	1	0.19
Breast Cancer	TRAF5	7188	1	0.19
Breast Cancer	LEAP-2	116842	1	0.19
Breast Cancer	AZGP1	563	1	0.19
Breast Cancer	HP	3240	1	0.19
Breast Cancer	APOF	319	1	0.19
Breast Cancer	CYR61	3491	1	0.18
Breast Cancer	KRT10	3858	1	0.18
Breast Cancer	GAS1	2619	1	0.18
Breast Cancer	PRTN3	5657	1	0.18
Breast Cancer	SCN7A	6332	1	0.18
Breast Cancer	CA4	762	1	0.18
Breast Cancer	HTRA3	94031	1	0.17
Breast Cancer	GRAMD3	65983	1	0.17
Breast Cancer	GSTM2	2946	1	0.16
Breast Cancer	BBOX1	8424	1	0.16
Breast Cancer	FLJ22662	79887	1	0.16
Breast Cancer	FLRT2	23768	1	0.16
Breast Cancer	TRPC4	7223	1	0.16
Breast Cancer	PLXND1	23129	1	0.15
Breast Cancer	VCAM1	7412	1	0.15
Breast Cancer	SCN3A	6328	1	0.15
Breast Cancer	CD300LG	146894	1	0.15
Breast Cancer	COL5A3	50509	1	0.15
Breast Cancer	LRG1	116844	1	0.14
Breast Cancer	COL18A1	80781	1	0.14
Breast Cancer	UBE4B	10277	1	0.14
Breast Cancer	TPP2	7174	1	0.14
Breast Cancer	TNXB	7148	1	0.13
Breast Cancer	INHBB	3625	1	0.13
Breast Cancer	FBLN5	10516	1	0.13
Breast Cancer	SEMA5A	9037	1	0.12
Breast Cancer	ABI3BP	25890	1	0.12
Breast Cancer	TESC	54997	1	0.11
Breast Cancer	IGSF4C	199731	1	0.11
Breast Cancer	VTN	7448	1	0.11
Breast Cancer	KCNB1	3745	1	0.1
Breast Cancer	SCNN1A	6337	1	0.1
Breast Cancer	RP13-102H20	158763	1	0.09
Breast Cancer	FXYD2	486	1	0.09
Breast Cancer	SCG3	29106	1	0.07
Breast Cancer	AK5	26289	1	0.07
Breast Cancer	ANKRD30A	91074	1	0.06
Breast Cancer	NOS3	4846	1	0.05
Breast Cancer	AIFM2	84883	1	0.05
Breast Cancer	PI16	221476	1	0.04
Breast Cancer	RYR1	6261	1	0.04
Breast Cancer	NULL	286133	1	0.03
Breast Cancer	TPH1	7166	1	0.03
Breast Cancer	MYH1	4619	1	0.02
Breast Cancer	PGAM2	5224	1	0.02
Breast Cancer	TUBB2C	10383	1	0.01
Breast Cancer	RETN	56729	1	0
Lung Cancer, Non-Small Cell	SPP1	6696	1	7.58
Lung Cancer, Non-Small Cell	CDCA7	83879	1	6.26
Lung Cancer, Non-Small Cell	EZH2	2146	1	5.09
Lung Cancer, Non-Small Cell	CDCA1	83540	1	4.26
Lung Cancer, Non-Small Cell	COL1A1	1277	1	3.8
Lung Cancer, Non-Small Cell	S100A7	6278	1	3.46
Lung Cancer, Non-Small Cell	DSP	1832	1	3.45
Lung Cancer, Non-Small Cell	BBS4	585	1	3.38
Lung Cancer, Non-Small Cell	CSE1L	1434	1	3.33
Lung Cancer, Non-Small Cell	MUTYH	4595	1	3.25
Lung Cancer, Non-Small Cell	CPT2	1376	1	3.21
Lung Cancer, Non-Small Cell	GGH	8836	1	3.2
Lung Cancer, Non-Small Cell	MTHFD2	10797	1	3.2
Lung Cancer, Non-Small Cell	CENPF	1063	1	3.18
Lung Cancer, Non-Small Cell	MCM7	4176	1	3.1
Lung Cancer, Non-Small Cell	CLIP2	7461	1	3.04
Lung Cancer, Non-Small Cell	TUBB2A	7280	1	3.03
Lung Cancer, Non-Small Cell	DLG7	9787	1	3
Lung Cancer, Non-Small Cell	RAB3B	5865	1	2.89
Lung Cancer, Non-Small Cell	GPR51	9568	1	2.8
Lung Cancer, Non-Small Cell	UCHL1	7345	1	2.76
Lung Cancer, Non-Small Cell	PRKDC	5591	1	2.69
Lung Cancer, Non-Small Cell	BLM	641	1	2.68
Lung Cancer, Non-Small Cell	MLLT11	10962	1	2.68
Lung Cancer, Non-Small Cell	BCHE	590	1	2.62
Lung Cancer, Non-Small Cell	BASP1	10409	1	2.57
Lung Cancer, Non-Small Cell	MCM6	4175	1	2.54
Lung Cancer, Non-Small Cell	MDK	4192	1	2.54
Lung Cancer, Non-Small Cell	C7orf24	79017	1	2.53
Lung Cancer, Non-Small Cell	PDE1C	5137	1	2.52
Lung Cancer, Non-Small Cell	THBS2	7058	1	2.51
Lung Cancer, Non-Small Cell	ENO1	2023	1	2.51
Lung Cancer, Non-Small Cell	PFN2	5217	1	2.51
Lung Cancer, Non-Small Cell	ACTL6A	86	1	2.46
Lung Cancer, Non-Small Cell	COL3A1	1281	1	2.45
Lung Cancer, Non-Small Cell	DLK1	8788	1	2.43
Lung Cancer, Non-Small Cell	LRP3	4037	1	2.43
Lung Cancer, Non-Small Cell	CXCL10	3627	1	2.41
Lung Cancer, Non-Small Cell	C6orf18	54535	1	2.39
Lung Cancer, Non-Small Cell	COL11A1	1301	1	2.39
Lung Cancer, Non-Small Cell	BUB1	699	1	2.39
Lung Cancer, Non-Small Cell	MIF	4282	1	2.36
Lung Cancer, Non-Small Cell	KRT14	3861	1	2.34
Lung Cancer, Non-Small Cell	ENO2	2026	1	2.33
Lung Cancer, Non-Small Cell	USP34	9736	1	2.33
Lung Cancer, Non-Small Cell	TPI1	7167	1	2.31
Lung Cancer, Non-Small Cell	KIF23	9493	1	2.3
Lung Cancer, Non-Small Cell	PDK1	5163	1	2.26
Lung Cancer, Non-Small Cell	TIMELESS	8914	1	2.26
Lung Cancer, Non-Small Cell	IMP4	92856	1	2.22
Lung Cancer, Non-Small Cell	FOSL1	8061	1	2.21
Lung Cancer, Non-Small Cell	ADAM12	8038	1	2.2
Lung Cancer, Non-Small Cell	FGF11	2256	1	2.2
Lung Cancer, Non-Small Cell	PVRL4	81607	1	2.2
Lung Cancer, Non-Small Cell	IGFBP2	3485	1	2.19
Lung Cancer, Non-Small Cell	C18orf54	162681	1	2.18
Lung Cancer, Non-Small Cell	RBP1	5947	1	2.15
Lung Cancer, Non-Small Cell	PDIA4	9601	1	2.11
Lung Cancer, Non-Small Cell	NME1-NME2	654364	1	2.1
Lung Cancer, Non-Small Cell	CABYR	26256	1	2.1
Lung Cancer, Non-Small Cell	BPGM	669	1	2.1
Lung Cancer, Non-Small Cell	FGFR1OP	11116	1	2.1
Lung Cancer, Non-Small Cell	HMMR	3161	1	2.09
Lung Cancer, Non-Small Cell	MLN	4295	1	2.05
Lung Cancer, Non-Small Cell	HSPD1	3329	1	2.04
Lung Cancer, Non-Small Cell	LY9	4063	1	2.04
Lung Cancer, Non-Small Cell	CCNB2	9133	1	2.03
Lung Cancer, Non-Small Cell	SFN	2810	1	2.03
Lung Cancer, Non-Small Cell	INADL	10207	1	2.02
Lung Cancer, Non-Small Cell	LIG3	3980	1	2
Lung Cancer, Non-Small Cell	YWHAZ	7534	1	2
Lung Cancer, Non-Small Cell	CS	1431	1	1.99
Lung Cancer, Non-Small Cell	TRADD	8717	1	1.98
Lung Cancer, Non-Small Cell	SGOL2	151246	1	1.96
Lung Cancer, Non-Small Cell	KIF1A	547	1	1.95
Lung Cancer, Non-Small Cell	CLSTN1	22883	1	1.94
Lung Cancer, Non-Small Cell	RAD51C	5889	1	1.94
Lung Cancer, Non-Small Cell	TRPM2	7226	1	1.93
Lung Cancer, Non-Small Cell	NCAPD3	23310	1	1.93
Lung Cancer, Non-Small Cell	PROM1	8842	1	1.93
Lung Cancer, Non-Small Cell	NIPSNAP1	8508	1	1.92
Lung Cancer, Non-Small Cell	PLOD2	5352	1	1.92
Lung Cancer, Non-Small Cell	DPYSL5	56896	1	1.92
Lung Cancer, Non-Small Cell	PGK1	5230	1	1.92
Lung Cancer, Non-Small Cell	HIST1H1C	3006	1	1.9
Lung Cancer, Non-Small Cell	ADA	100	1	1.89
Lung Cancer, Non-Small Cell	RAD18	56852	1	1.89
Lung Cancer, Non-Small Cell	ALDOA	226	1	1.88
Lung Cancer, Non-Small Cell	CDCA7L	55536	1	1.88
Lung Cancer, Non-Small Cell	RAB40C	57799	1	1.87
Lung Cancer, Non-Small Cell	C1orf41	51668	1	1.87
Lung Cancer, Non-Small Cell	COL1A2	1278	1	1.86
Lung Cancer, Non-Small Cell	DDX24	57062	1	1.86
Lung Cancer, Non-Small Cell	C17orf75	64149	1	1.85
Lung Cancer, Non-Small Cell	SLC7A11	23657	1	1.85
Lung Cancer, Non-Small Cell	LBR	3930	1	1.84
Lung Cancer, Non-Small Cell	MKI67	4288	1	1.84
Lung Cancer, Non-Small Cell	CRABP2	1382	1	1.83
Lung Cancer, Non-Small Cell	RRM2	6241	1	1.83
Lung Cancer, Non-Small Cell	NF1	4763	1	1.83
Lung Cancer, Non-Small Cell	NRCAM	4897	1	1.82
Lung Cancer, Non-Small Cell	MMP9	4318	1	1.82
Lung Cancer, Non-Small Cell	PREX1	57580	1	1.82
Lung Cancer, Non-Small Cell	PLOD3	8985	1	1.82
Lung Cancer, Non-Small Cell	MARK1	4139	1	1.82
Lung Cancer, Non-Small Cell	CKAP2	26586	1	1.82
Lung Cancer, Non-Small Cell	ZNF93	81931	1	1.82
Lung Cancer, Non-Small Cell	NONO	4841	1	1.81
Lung Cancer, Non-Small Cell	HELLS	3070	1	1.8
Lung Cancer, Non-Small Cell	PAK1IP1	55003	1	1.8
Lung Cancer, Non-Small Cell	ATG16L2	89849	1	1.79
Lung Cancer, Non-Small Cell	SPINK1	6690	1	1.79
Lung Cancer, Non-Small Cell	FLJ25416	220042	1	1.79
Lung Cancer, Non-Small Cell	CDH1	999	1	1.79
Lung Cancer, Non-Small Cell	PIK3R2	5296	1	1.79
Lung Cancer, Non-Small Cell	ZFHX4	79776	1	1.79
Lung Cancer, Non-Small Cell	HD	3064	1	1.79
Lung Cancer, Non-Small Cell	ERO1L	30001	1	1.79
Lung Cancer, Non-Small Cell	BRCA2	675	1	1.78
Lung Cancer, Non-Small Cell	SLC2A5	6518	1	1.78
Lung Cancer, Non-Small Cell	GANC	2595	1	1.78
Lung Cancer, Non-Small Cell	LRRC15	131578	1	1.78
Lung Cancer, Non-Small Cell	LHB	3972	1	1.78
Lung Cancer, Non-Small Cell	GFPT1	2673	1	1.77
Lung Cancer, Non-Small Cell	ARHGEF1	9138	1	1.77
Lung Cancer, Non-Small Cell	ITGB4BP	3692	1	1.76
Lung Cancer, Non-Small Cell	MMP11	4320	1	1.76
Lung Cancer, Non-Small Cell	TTYH3	80727	1	1.76
Lung Cancer, Non-Small Cell	DPYS	1807	1	1.76
Lung Cancer, Non-Small Cell	PGBD1	84547	1	1.76
Lung Cancer, Non-Small Cell	DNA2L	1763	1	1.75
Lung Cancer, Non-Small Cell	MPHOSPH1	9585	1	1.75
Lung Cancer, Non-Small Cell	CAPRIN1	4076	1	1.75
Lung Cancer, Non-Small Cell	UTY	7404	1	1.74
Lung Cancer, Non-Small Cell	CENPE	1062	1	1.74
Lung Cancer, Non-Small Cell	KRT8	3856	1	1.74
Lung Cancer, Non-Small Cell	COPG	22820	1	1.74
Lung Cancer, Non-Small Cell	MOCS3	27304	1	1.74
Lung Cancer, Non-Small Cell	SDK1	221935	1	1.74
Lung Cancer, Non-Small Cell	CACNB1	782	1	1.73
Lung Cancer, Non-Small Cell	TACSTD1	4072	1	1.73
Lung Cancer, Non-Small Cell	TUBB2C	10383	1	1.73
Lung Cancer, Non-Small Cell	NULL	23141	1	1.72
Lung Cancer, Non-Small Cell	NAT14	57106	1	1.72
Lung Cancer, Non-Small Cell	EPOR	2057	1	1.72
Lung Cancer, Non-Small Cell	BRI3BP	140707	1	1.72
Lung Cancer, Non-Small Cell	HPRT1	3251	1	1.72
Lung Cancer, Non-Small Cell	NUTF2	10204	1	1.72
Lung Cancer, Non-Small Cell	UPF3A	65110	1	1.71
Lung Cancer, Non-Small Cell	AZGP1	563	1	1.71
Lung Cancer, Non-Small Cell	KIF11	3832	1	1.71
Lung Cancer, Non-Small Cell	LDHA	3939	1	1.71
Lung Cancer, Non-Small Cell	HRAS	3265	1	1.7
Lung Cancer, Non-Small Cell	SMG5	23381	1	1.7
[truncated: 14,623 more rows]
