# Supplementary material for: Differentially Expressed RNA from Public Microarray Data Identifies Serum Protein Biomarkers for Cross-Organ Transplant Rejection and Other Conditions
Source: PubMed Central journal article supplement (PMC2944782; doi:10.1371/journal.pcbi.1000940), 2010-09-23

**Fig. S3: ROC curves predicting renal and cardiac AR using PECAM1+CXCL9**

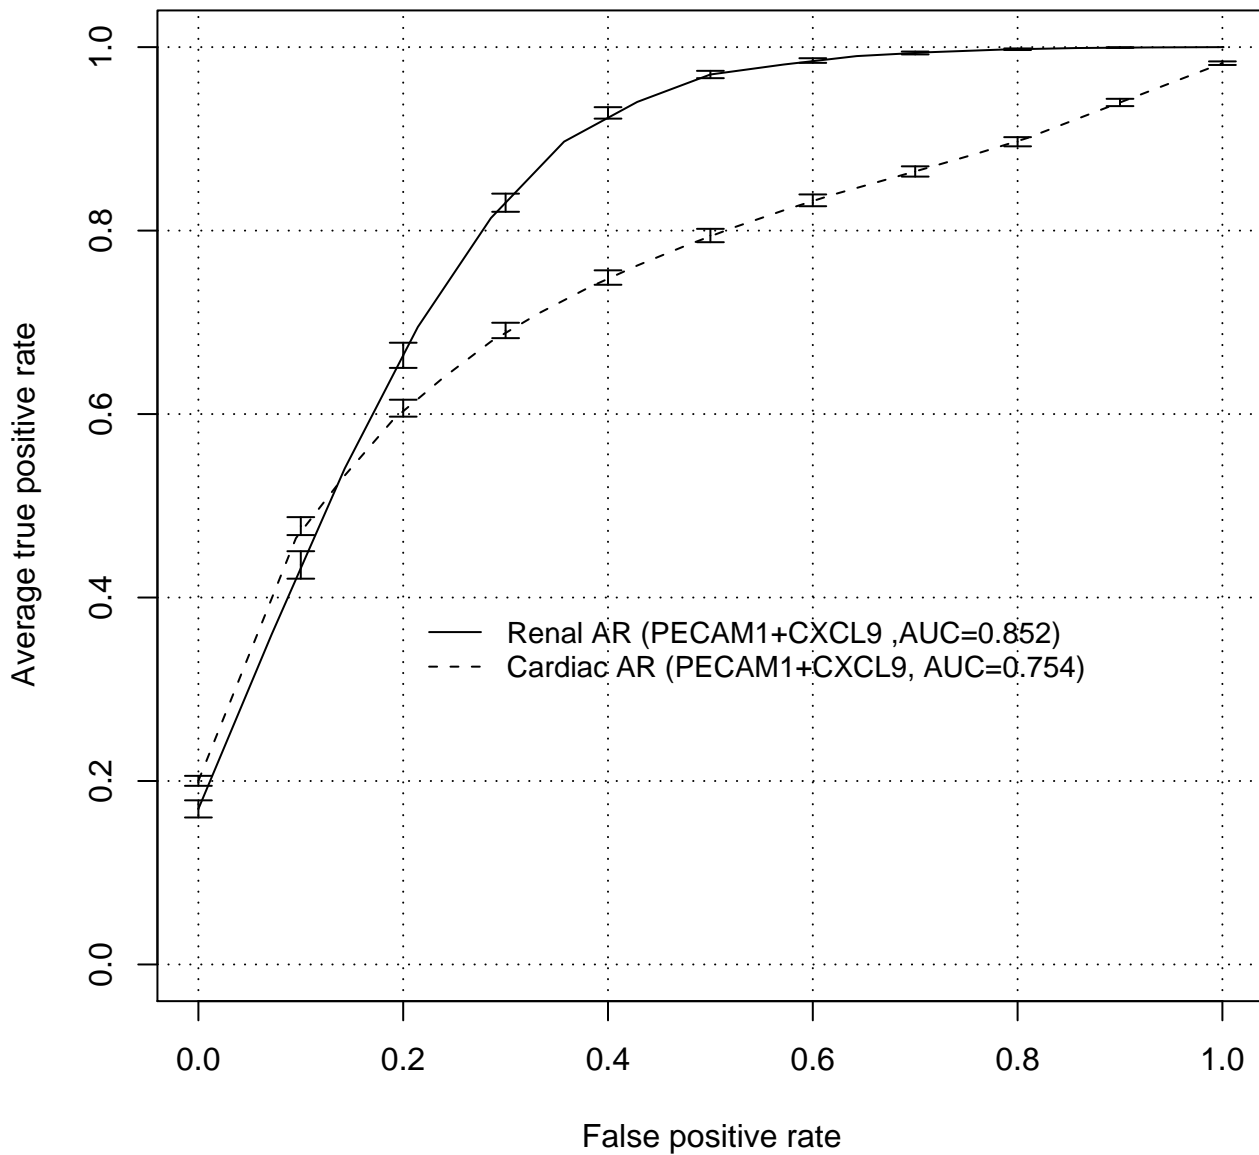

Supplement: pcbi.1000940.s004.pdf [file pcbi.1000940.s004.pdf]
