# Supplementary material for: Differentially Expressed RNA from Public Microarray Data Identifies Serum Protein Biomarkers for Cross-Organ Transplant Rejection and Other Conditions
Source: PLOS journal article supplement (doi:10.1371/journal.pcbi.1000940), 2010-09-23

Fig. S2: Shared pathway for AR across solid-organ transplantation

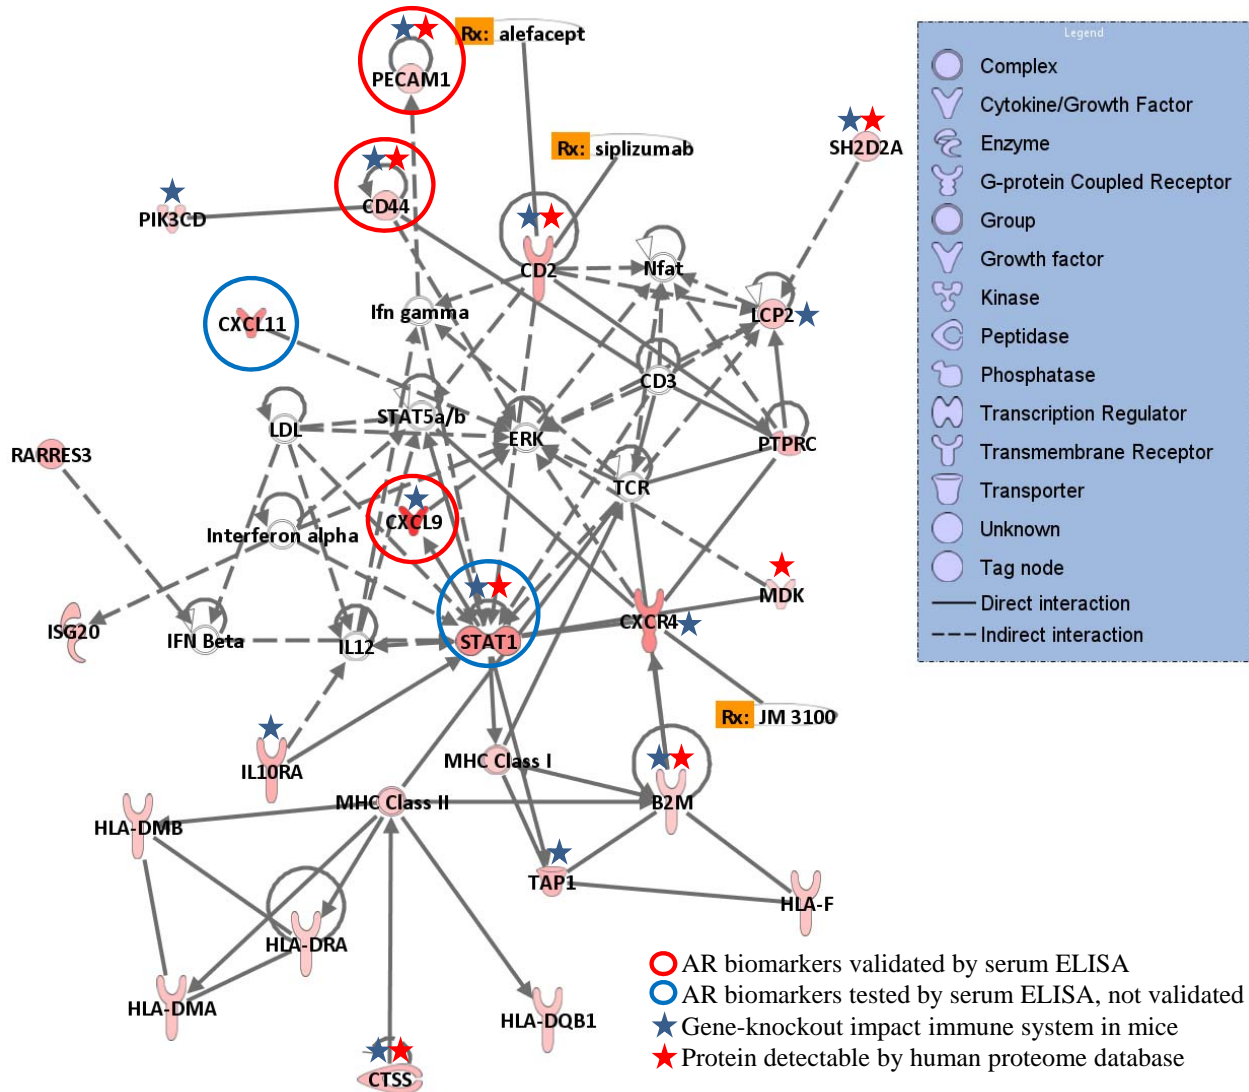

Supplement: S3 (10.1371/journal.pcbi.1000940.s003) [file journal.pcbi.1000940.s003]
